# ***BRAF* Mutation in Papillary Thyroid Cancer: Pathogenic Role, Molecular Bases, and Clinical Implications**

Mingzhao Xing

*Division of Endocrinology and Metabolism, the Johns Hopkins University School of Medicine, Baltimore, Maryland 21287*

In recent years, the T1799A B-type Raf kinase (*BRAF*) mutation in thyroid cancer has received enthusiastic investigation, and significant progress has been made toward understanding its tumorigenic role and clinical significance. Among various thyroid tumors, this mutation occurs uniquely in papillary thyroid cancer (PTC), the most common endocrine malignancy, and some apparently PTC-derived anaplastic thyroid cancers. Many studies have found this mutation to be associated with those clinicopathological characteristics of PTC that are conventionally known to predict tumor progression and recurrence, including, for example, old patient age, extrathyroidal invasion, lymph node metastasis, and advanced tumor stages. Direct association of *BRAF* mutation with the clinical progression, recurrence, and treatment failure of PTC has also been demonstrated. The *BRAF* mutation has even been correlated with PTC recurrence in patients with conventionally low-risk clinicopathological factors.

Some molecular mechanisms determining *BRAF* mutation-promoted progression and the aggressiveness of PTC have recently been uncovered. These include the down-regulation of major tumor suppressor genes and thyroid iodide-metabolizing genes and the up-regulation of cancer-promoting molecules, such as vascular endothelial growth factor, matrix metalloproteinases, nuclear transcription factor  $\kappa$ B, and c-Met. Thus, *BRAF* mutation represents a novel indicator of the progression and aggressiveness of PTC. Significant advances have also occurred in the preclinical testing of new therapeutic strategies targeting the MAPK pathway aberrantly activated by *BRAF* mutation and other related mutations. New mitogen extracellular kinase (MEK) inhibitors developed recently are particularly promising therapeutic agents for thyroid cancer. With these advances, it has become clearer that *BRAF* mutation will likely have significant impact on the clinical management of PTC. (*Endocrine Reviews* 28: 742–762, 2007)

- I. Introduction
  - A. Thyroid cancer
  - B. Clinicopathological risk evaluation of thyroid cancer
  - C. MAPK pathway and its activating genetic alterations
  - D. *BRAF* mutation in thyroid cancer
- II. Association of *BRAF* Mutation with High-Risk Clinicopathological Characteristics of PTC
  - A. Data supporting a positive association
  - B. Association of *BRAF* mutation with the most aggressive clinicopathological characteristics of PTC
  - C. Studies with negative results
- III. Association of *BRAF* Mutation with Recurrence of PTC and Loss of Radioiodine Avidity in Recurrent Tumors
  - A. Association with recurrence of PTC
  - B. Association with loss of radioiodine avidity in recurrent PTC
- IV. Molecular Bases for *BRAF* Mutation-Promoted Invasiveness and Progression of PTC
  - A. Unique role of *BRAF* mutation in thyroid tumorigenesis
  - B. *BRAF* mutation-associated aberrant methylation and silencing of tumor suppressor genes
  - C. Up-regulation of tumor-promoting molecules by *BRAF* mutation
  - D. Silencing of thyroid iodide-metabolizing genes in PTC
- V. Testing of *BRAF* Mutation as a Potentially New Dimension to Risk Stratification and Clinical Management of PTC
  - A. *BRAF* mutation as a novel prognostic molecular marker for PTC
  - B. Potential utility of *BRAF* mutation in guiding medical management of PTC
  - C. Value of preoperative testing of *BRAF* mutation on fine-needle aspiration biopsy in patients with PTC
  - D. Special usefulness of *BRAF* mutation in the management of conventionally low-stage PTC
- VI. *BRAF* Mutation and Related Signaling Pathways as Novel Therapeutic Targets for Thyroid Cancer
  - A. MAPK pathway as a major therapeutic target
  - B. MEK inhibitors as highly promising therapeutic agents for thyroid cancer
  - C. Restoring the expression of thyroid iodide-metabolizing genes by suppressing MAPK pathway
  - D. Targeting multiple signaling pathways in aggressive thyroid cancers
- VII. Concluding Remarks

## **I. Introduction**

### **A. Thyroid cancer**

FOLLICULAR EPITHELIAL cell-derived thyroid cancer is the most common endocrine malignancy, and its incidence is rapidly rising in many areas of the world (1–4).

First Published Online October 16, 2007

Abbreviations: ATC, Anaplastic thyroid cancer(s); *BRAF*, B-type Raf kinase; CI, confidence interval; CIMP, CpG island methylator phenotype; FNAB, fine-needle aspiration biopsy; FTC, follicular thyroid cancer; MEK, mitogen extracellular kinase; MMP, matrix metalloproteinase; NF- $\kappa$ B, nuclear transcription factor  $\kappa$ B; NIS, sodium/iodide symporter; PI3K, phosphoinositol-3 kinase; PTC, papillary thyroid cancer(s); siRNA, small interfering RNA; Tg, thyroglobulin; TIMP, tissue inhibitor of MMP; TPO, thyroperoxidase; TSHR, TSH receptor; VEGF, vascular endothelial growth factor.

*Endocrine Reviews* is published by The Endocrine Society (<http://www.endo-society.org>), the foremost professional society serving the endocrine community.

In the United States, the rise in the incidence of this cancer is the fastest among common human cancers, with a current incidence of 33,550 cases per year and a prevalence of 366,466 cases (4). The major histological types of thyroid cancer are papillary thyroid cancer (PTC), follicular thyroid cancer (FTC), and anaplastic thyroid cancer (ATC). The vast majority of thyroid cancers are PTC, which accounts for more than 80% of all thyroid malignancies (1, 2, 5). The rising incidence of thyroid cancer is almost entirely attributed to the increased diagnosis of PTC, particularly small PTC (1, 2). Differentiated thyroid cancer, including PTC, is relatively indolent and highly curable. However, a significant recurrence rate, about 20% at 10 yr and 30% at 30 yr of follow-up, is seen after initial treatment (6). The negative psychosocial and economic impact of such recurrence can be significant, and the quality of life for patients with recurrent thyroid cancer can be compromised. Although thyroid cancer-associated mortality is low—standard surgical treatment in conjunction with radioiodine ablation therapy is highly curative in most patients—some still die from this condition. The current mortality rate in the United States is 1,530 cases per year (4). Patients face an increased chance of death when the cancer becomes surgically inoperable and when it has lost radioiodine avidity. There is currently no curative treatment for this group of patients. Appropriate management of patients based upon accurate risk stratification and prognostic evaluation is therefore important for reducing the recurrence rate as well as the morbidity and mortality of thyroid cancer.

#### B. Clinicopathological risk evaluation of thyroid cancer

Conventional clinicopathological evaluation is currently the basis upon which risk stratification is pursued for patients with thyroid cancer (7, 8). There are several clinicopathological characteristics that are classical high-risk factors, including old patient age at the time of diagnosis, male gender, large tumor size, extrathyroidal invasion, lymph node metastasis, distant metastasis, and advanced disease stages (3, 6, 8–12). Each of these clinicopathological risk factors has been shown to be associated with an increased risk for the progression, recurrence, and even morbidity and mortality of thyroid cancer. For PTC, histological subtype is also an important factor in the risk evaluation of this cancer. These subtypes include mainly tall cell PTC, conventional PTC, and follicular variant PTC, which are associated with tumor aggressiveness in the order of tall cell PTC > conventional PTC > follicular variant PTC (13–17). Currently, risk stratification is the chief consideration in determining the aggressiveness with which to manage thyroid cancer, including both the extent of the initial treatment, such as whether to treat with radioiodine ablation after thyroidectomy, and the degree of vigilance in subsequent follow-up of the patient, such as how often to pursue surveillance testing. The reliability of this clinicopathological criteria-based approach, however, can be uncertain, particularly in patients with conventionally low clinicopathological stages (10, 18).

#### C. MAPK pathway and its activating genetic alterations

As illustrated in Fig. 1, the RET/PTC → Ras → Raf → mitogen extracellular kinase (MEK) → MAPK/ERK pathway

(hereafter referred to as “MAPK pathway”) is a classical conserved intracellular signaling pathway that plays a fundamental role in cell functions such as proliferation, differentiation, apoptosis, and survival (19–21), and, when aberrantly activated, tumorigenesis (22–25). Physiological activation of this pathway is triggered by a large array of growth factors, hormones, and cytokines through their receptors on the cell membrane. In normal cells, the activation of the Raf kinase occurs through direct interaction with GTP-bound Ras, a membrane-bound small G protein. Activated Raf, a serine/threonine protein kinase, phosphorylates and activates the immediate down-stream MEK, which, also a serine/threonine protein kinase, in turn phosphorylates and activates ERK. The activated ERK phosphorylates regulatory protein molecules in the nucleus and ultimately alters gene expression with consequent changes in the biological activities of the cell.

Aberrant activation of the MAPK pathway, through activating genetic alterations, has long been seen in many human cancers (26). RET/PTC, with more than 10 types known to exist mainly in thyroid cancer, represents a recombinant protein product of a chromosomal rearrangement with the combination of the 3' portion of the *RET* gene and the 5' portion of an unrelated gene (27, 28). This recombination confers ligand-independent activation of the tyrosine kinase contained in the *RET/PTC* protein product. It has been recently established that RET/PTC signaling in thyroid cells utilizes the MAPK pathway (29–31). Activating *Ras* mutation is a classical and common cause of aberrant activation of the MAPK pathway in human cancers (24, 32). The B-type Raf kinase (*BRAF*) mutation was recently discovered to be another major cause of aberrant activation of the MAPK pathway in human cancers (23, 33–35). There are three Raf kinases, A-Raf, B-Raf (*BRAF*), and C-Raf (36). Among the three, *BRAF* is the most potent activator of the MAPK pathway in many cells (23). Therefore, activating mutation of the *BRAF* gene is of particular importance in human cancers, especially in those that show a high prevalence of this mutation, such as thyroid cancer (13), the focus of this review.

#### D. *BRAF* mutation in thyroid cancer

Since the initial discovery of *BRAF* mutation in human cancers (33), there have been more than 40 mutations identified in the *BRAF* gene, among which the T1799A point *BRAF* mutation is the most common and accounts for more than 90% of all the mutations found in the *BRAF* gene (35). This mutation has been found to occur frequently in thyroid cancer (13, 37–42). The T1799A *BRAF* mutation causes a V600E amino acid change in the *BRAF* protein, resulting in the constitutive and oncogenic activation of the mutated *BRAF* kinase (33, 43). A few other activated *BRAF* mutants are only rarely found in thyroid cancer, such as the *BRAF* K601E (44), AKAP9-*BRAF* (45), *BRAF* V599ins (46), *BRAF* V600E+K601del (47, 48), and a recently characterized novel *BRAF* mutant, V600D+FGLAT601–605ins, resulting from an insertion of 18 nucleotides at nucleotide T1799 of the *BRAF* gene (47). Thus, the T1799A mutation is virtually the only *BRAF* mutation identified in thyroid cancer (hereafter referred to as “*BRAF* mutation”). *BRAF* mutation represents a

FIG. 1. Schematic illustration of the MAPK pathway. The signaling starts at the cell membrane receptor upon stimulation by extracellular mitogenic signals (*e.g.*, growth factors). Upon activation by binding with GTP, the Ras protein interacts with and activates Raf protein kinase. The B-type Raf kinase, or *BRAF*, is the most abundant and potent in the Raf family in many cells and is shown here in the figure. Activated *BRAF* phosphorylates and activates two MEKs, MEK1 and MEK2. Activated MEK1/2 in turn phosphorylates and activates the two immediately downstream ERKs, ERK1 and ERK2. ERK1/2 subsequently phosphorylates downstream proteins, many of which are kinases themselves, ultimately leading to alterations in the expression of various genes in the nucleus involved in cell proliferation, growth, survival, and tumorigenesis. Unique to some PTC is also the occurrence of RET/PTC, a recombinant protein consisting of the tyrosine kinase domain of the RET, a membrane receptor tyrosine kinase, and a portion of an unrelated protein. RET/PTC can activate the MAPK pathway through a step upstream of Ras. \*, The gene for *BRAF* is a common site for mutations in this pathway, with the activating T1799A mutation commonly seen in PTC, which is the focus of this review.

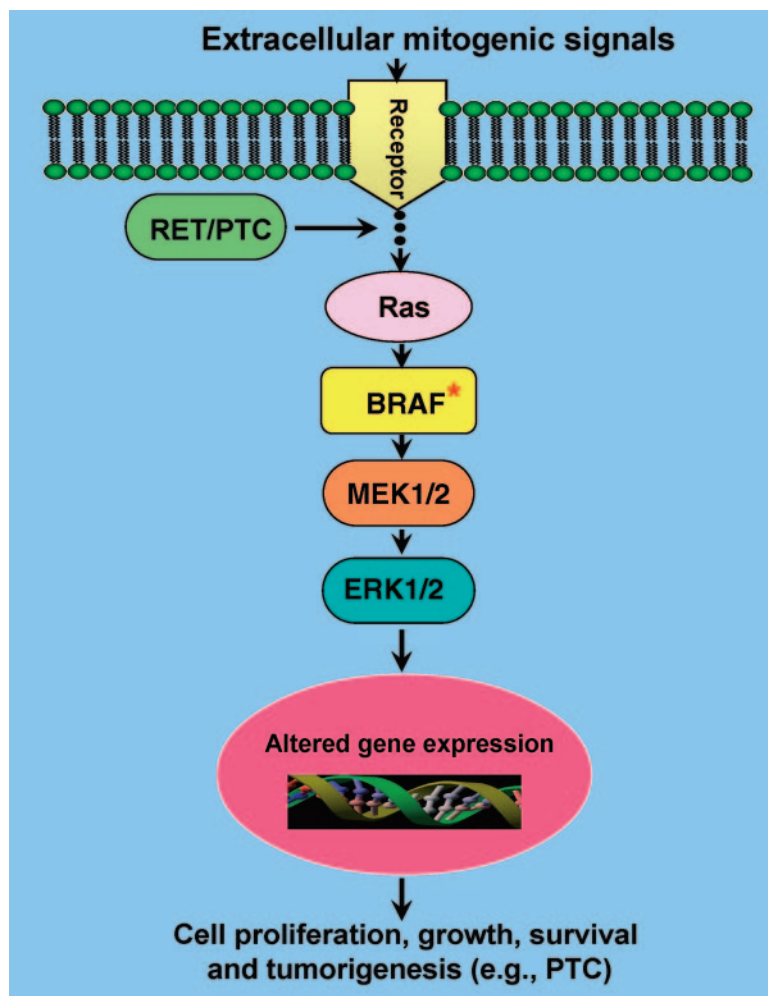

somatic genetic alteration and is not a germline mutation in familial thyroid cancer (49, 50). A striking finding on *BRAF* mutation in thyroid cancer is its exclusive occurrence in PTC and PTC-derived ATC, with an average prevalence of 44% in the former and 24% in the latter, and it does not occur in FTC or other types of thyroid tumors (13). The high prevalence and high specificity of *BRAF* mutation for PTC suggest a unique and fundamental pathogenic role of this mutation in PTC, which has led to great enthusiasm in recent years over the potential clinical utility of this mutation as a novel prognostic molecular marker and as an effective target for the treatment of PTC. Several short reviews on *BRAF* mutation in thyroid cancer have been published recently (27, 51–57). This article is intended to provide a comprehensive review on this mutation in thyroid cancer, with an emphasis on its pathogenic role, underlying molecular bases, prognostic value, and potential as a novel therapeutic target.

## II. Association of *BRAF* Mutation with High-Risk Clinicopathological Characteristics of PTC

### A. Data supporting a positive association

Many studies have investigated the relationship of *BRAF* mutation with clinicopathological characteristics of PTC (40,

42, 58–85) (Table 1). Although the results are not entirely consistent, most of the studies from various ethnic and geographical backgrounds demonstrate a significant association of *BRAF* mutation with one or more conventional high-risk clinicopathological characteristics of PTC (40, 59, 61, 63, 64, 66–69, 71, 72, 74, 76, 79, 80, 82, 83, 85). For example, in a large series of PTC cases consisting of mainly American patients, a significant association of *BRAF* mutation with extrathyroidal invasion and advanced disease stages III and VI was reported by Nikiforova *et al.* (76). In a Japanese study, an association of *BRAF* mutation with advanced disease stages of PTC was observed by Namba *et al.* (40). Three Korean studies (67, 68, 72) reported a significant association of *BRAF* mutation with lymph node metastasis or extrathyroidal invasion. One of them showed an independent association of *BRAF* mutation with lymph node metastasis even in further multivariate analysis with adjustment for confounding factors (67). A Mayo Clinic study by Jin *et al.* (64) also reported a significant association of *BRAF* mutation with lymph node metastasis and extrathyroidal invasion. In a large comprehensive international multicenter study, Xing *et al.* (83) reported a close association of *BRAF* mutation with extrathyroidal invasion, lymph node metastasis, and advanced disease stages. Similarly, three recent studies—from the



TABLE 1. Correlation of *BRAF* mutation with clinicopathological characteristics of PTC

| Study no. | Extrathyroidal invasion     |               |                             | Lymph node metastasis       |               |                             | Disease stages III and IV   |               |                             | First author, year (Ref.)         |
|-----------|-----------------------------|---------------|-----------------------------|-----------------------------|---------------|-----------------------------|-----------------------------|---------------|-----------------------------|-----------------------------------|
|           | BRAF +                      | BRAF –        | <i>P</i> value <sup>a</sup> | BRAF +                      | BRAF –        | <i>P</i> value <sup>a</sup> | BRAF +                      | BRAF –        | <i>P</i> value <sup>a</sup> |                                   |
| 1         | 16/38 (42)                  | 13/66 (20)    | 0.014                       | 23/38 (61)                  | 29/66 (44)    | 0.103                       | 17/38 (45)                  | 5/66 (8)      | <0.001                      | Nikiforova, 2003 (76)             |
| 2         | 14/38 (37)                  | 24/88 (27)    | 0.283                       | 21/38 (55)                  | 54/88 (61)    | 0.522                       | 26/38 (68)                  | 46/88 (52)    | 0.093                       | Namba, 2003 (40)                  |
| 3         |                             |               |                             | 7/21 (33)                   | 6/35 (17)     | 0.165                       | 4/21 (19)                   | 7/35 (20)     | 0.931                       | Xu, 2003 (42)                     |
| 4         | 10/22 (45)                  | 10/29 (34)    | 0.427                       |                             |               |                             | 8/16 (50)                   | 9/22 (41)     | 0.578                       | Puxeddu, 2004 (78) <sup>b</sup>   |
| 5         |                             |               |                             | 12/16 (75)                  | 13/23 (57)    | 0.237                       | 7/18 (39)                   | 9/29 (31)     | 0.581                       | Fugazzola, 2004 (62) <sup>b</sup> |
| 6         |                             |               |                             | 39/58 (67)                  | 4/12 (33)     | 0.028                       |                             |               |                             | Kim, 2004 (68)                    |
| 7         |                             |               |                             | 3/13 (23)                   | 8/33 (24)     | 0.933                       |                             |               |                             | Sedliarou, 2004 (81)              |
| 8         | 44/107 (41)                 | 18/112 (16)   | <0.001                      | 58/107 (54)                 | 24/112 (21)   | <0.001                      | 31/107 (29)                 | 16/112 (14)   | 0.008                       | Xing, 2005 (83)                   |
| 9         | 7/21 (33)                   | 10/53 (19)    | 0.182                       | 11/21 (52)                  | 18/53 (34)    | 0.143                       |                             |               |                             | Trovisco, 2005 (82) <sup>c</sup>  |
| 10        | 15/31 (48)                  | 11/29 (38)    | 0.414                       | 21/31 (68)                  | 15/29 (52)    | 0.206                       | 13/31 (42)                  | 11/29 (38)    | 0.752                       | Kim, 2005 (70)                    |
| 11        |                             |               |                             | 24/64 (38)                  | 7/15 (47)     | 0.513                       |                             |               |                             | Kim, 2005 (69)                    |
| 12        | 26/47 (55)                  | 26/54 (48)    | 0.472                       | 17/47 (36)                  | 24/54 (44)    | 0.398                       | 19/47 (40)                  | 17/54 (31)    | 0.349                       | Liu, 2005 (73)                    |
| 13        | 16/40 (40)                  | 8/57 (14)     | 0.004                       | 21/40 (53)                  | 29/57 (51)    | 0.875                       | 16/40 (40)                  | 7/57 (12)     | 0.002                       | Adeniran, 2006 (59)               |
| 14        | 18/28 (64)                  | 11/39 (28)    | 0.003                       | 9/28 (32)                   | 9/39 (23)     | 0.409                       | 23/28 (82)                  | 16/39 (41)    | <0.001                      | Riesco-Eizaguirre, 2006 (79)      |
| 15        | 107/149 (72)                | 31/54 (57)    | 0.052                       | 116/149 (78)                | 37/54 (69)    | 0.173                       | 62/149 (42)                 | 17/54 (31)    | 0.191                       | Kim, 2006 (71)                    |
| 16        |                             |               |                             | 26/34 (76)                  | 12/69 (17)    | <0.001                      | 5/34 (15)                   | 4/69 (6)      | 0.152                       | Kim, 2006 (67)                    |
| 17        | 32/58 (55)                  | 14/42 (33)    | 0.031                       | 14/58 (24)                  | 10/42 (24)    | 0.970                       | 19/58 (33)                  | 7/42 (17)     | 0.070                       | Lee, 2006 (72)                    |
| 18        | 8/31 (26)                   | 2/27 (7)      | 0.087                       | 15/31 (48)                  | 7/27 (26)     | 0.106                       |                             |               |                             | Jin, 2006 (64) <sup>d</sup>       |
| 19        | 34/53 (64)                  | 5/8 (62)      | 0.928                       | 21/53 (40)                  | 2/8 (25)      | 0.426                       |                             |               |                             | Park, 2006 (77)                   |
| 20        | 68/102 (67)                 | 31/59 (53)    | 0.076                       | 49/102 (48)                 | 27/59 (46)    | 0.780                       | 23/102 (23)                 | 11/59 (19)    | 0.559                       | Jo, 2006 (65)                     |
| 21        |                             |               |                             | 0/18 (0)                    | 7/19 (37)     | 0.004                       | 1/18 (6)                    | 6/19 (32)     | 0.043                       | Sapio, 2006 (84)                  |
| 22        | 12/24 (50)                  | 7/20 (35)     | 0.317                       | 10/24 (42)                  | 11/20 (55)    | 0.378                       |                             |               |                             | Abrosimov, 2007 (58)              |
| 23        |                             |               |                             |                             |               |                             | 8/21 (38)                   | 11/37 (30)    | 0.514                       | Mitsiades, 2007 (75)              |
| 24        | 14/56 (25)                  | 12/36 (33)    | 0.386                       | 16/55 (29)                  | 12/37 (32)    | 0.733                       | 15/43 (35)                  | 7/32 (22)     | 0.221                       | Durante, 2007 (60)                |
| 25        | 82/214 (38)                 | 47/286 (16)   | <0.001                      | 34/214 (16)                 | 19/286 (7)    | <0.001                      | 81/214 (38)                 | 46/286 (16)   | <0.001                      | Lupi, 2007 (74)                   |
| 26        |                             |               |                             | 23/88 (26)                  | 19/126 (15)   | 0.045                       |                             |               |                             | Rodolico, 2007 (80)               |
| 27        | 24/111 (22)                 | 20/98 (20)    | 0.830                       | 53/111 (48)                 | 32/98 (33)    | 0.027                       | 39/111 (35)                 | 12/98 (12)    | <0.001                      | Kebebew, 2007 (66) <sup>e</sup>   |
| 28        | 30/54 (56)                  | 18/54 (33)    | 0.020                       | 18/54 (33)                  | 16/54 (30)    | 0.679                       | 16/54 (30)                  | 7/54 (13)     | 0.034                       | Wang, 2007 <sup>f</sup>           |
| Overall   | 577/1224 (47)               | 318/1211 (26) | <0.001                      | 661/1513 (44)               | 451/1515 (30) | <0.001                      | 433/1188 (36)               | 271/1281 (21) | <0.001                      |                                   |
|           | OR, 2.50; 95% CI, 2.11–2.97 |               |                             | OR, 1.83; 95% CI, 1.58–2.13 |               |                             | OR, 2.14; 95% CI, 1.79–2.56 |               |                             |                                   |

Data represent number/total (percent). OR, Odds ratio.

<sup>a</sup> *P* value per  $\chi^2$  test.<sup>b</sup> Because many, but an unknown specific number of, cases from these two studies were overlapped with the cases in a recent study of the same authors [Fugazzola *et al.*, 2006 (63)], the latter study is not included in this table.<sup>c</sup> This represents combined data on both conventional and follicular variant PTC from Table 3 of the study of Trovisco *et al.* (82).<sup>d</sup> These stratified data were provided by Dr. Ricardo V. Lloyd through a personal communication, which was collectively reported in the original publication [Jin *et al.*, 2006 (64)].<sup>e</sup> The raw data were provided by Dr. Electron Kebebew through a personal communication, which was not directly reported in the original publication [Kebebew *et al.*, 2007 (66)].<sup>f</sup> Unpublished data.

United States (59), Spain (79), and Italy (61)—have all demonstrated a significant association of *BRAF* mutation with extrathyroidal invasion and advanced stages. Association of *BRAF* mutation with lymph node metastasis was also reported in the Italian study (61). Consistent with the role of *BRAF* mutation in lymph node metastasis of PTC, several studies observed a high prevalence of *BRAF* mutation in lymph node-metastasized PTC (48, 66, 67, 80, 86, 87). Interestingly, in these studies, *BRAF* mutation was sometimes found to be in the lymph node-metastasized PTC but not in the primary tumors, raising the possibility that this mutation could occur *de novo* in PTC cells metastasized to lymph nodes. To further support a role of *BRAF* mutation in lymph node metastasis of PTC, Rodolico *et al.* (80) recently demonstrated that metastatic PTC lesions in lymph nodes harboring *BRAF* mutation were larger in size than those harboring wide-type alleles. This study also showed a higher prevalence of extracapsular invasion of metastasized lymph nodes with *BRAF* mutation than metastasized lymph nodes without the mutation. A recent short meta-analysis on selected reports was published during the revision of this review and revealed a significant association of *BRAF* mutation with extrathyroidal invasion, lymph node metastasis, and advanced stages of PTC (54). Lupi *et al.* (74) recently reported their results of a study on 500 cases of PTC in a homogenous

Italian cohort from a single institution, which represented the largest study ever on the relationship between *BRAF* mutation and clinicopathological outcomes. A strong association of *BRAF* mutation with extrathyroidal invasion, lymph node metastasis, and advanced tumor stages was demonstrated in this study. Interestingly, *BRAF* mutation was also found to be significantly associated with lack of tumor capsule in this study. It has been shown that PTC tumors that lack the capsule are associated with a higher risk for metastasis and recurrence (74, 88, 89). A recent large American study on PTC also confirmed some of the previous findings, including the association of *BRAF* mutation with lymph node metastasis and advanced tumor stages III and IV (66). Because distant metastasis of PTC is uncommon, particularly in adult patients, few studies had a sufficient number of cases to look at its relationship with *BRAF* mutation. Two large studies that looked at this issue showed a significant association of *BRAF* mutation with distant metastasis of PTC (40, 66). Among various subtypes of PTC, *BRAF* mutation occurred most commonly in the aggressive subtype, tall cell PTC; second most commonly in conventional PTC; and least commonly in follicular variant PTC (66, 74, 76, 79, 82, 83, 86, 90), with an average prevalence of 77, 60, and 12%, respectively (13). Association of *BRAF* mutation with larger tumor size is reported in several studies (65, 67, 71). In a larger study,

however, *BRAF* mutation was seen to be associated with a somewhat smaller tumor size in PTC (83). It therefore appears that *BRAF* mutation promotes the aggressiveness of PTC mainly by promoting its invasiveness and metastasis. *BRAF* mutation is an adult-associated mutation and is rarely seen in pediatric populations (13, 27). Even in adult populations, an association of *BRAF* mutation with older age was demonstrated in several studies (59, 63, 66, 69, 76, 80, 82, 85). A significant association of *BRAF* mutation with male gender has also been observed in a few studies (42, 71). The predilection of *BRAF* mutation for old and male patients may partially explain the known association of old age and male gender with thyroid cancer progression and aggressiveness.

#### *B. Association of BRAF mutation with the most aggressive clinicopathological characteristics of PTC*

Among the various clinicopathological risk factors discussed above, extrathyroidal invasion, lymph node metastasis, and advanced clinicopathological stages III and IV most reliably predict thyroid cancer progression, recurrence, aggressiveness, and, ultimately, higher morbidity and mortality (6, 8–11). Interestingly, among the various clinicopathological characteristics of PTC, many studies have found that *BRAF* mutation is also most commonly associated with these three risk predictors (Table 1 and Fig. 2). When all the published studies that provide sufficient information to calculate the number of analyzed cases are pooled, a significant association of *BRAF* mutation with extrathyroidal invasion, lymph node metastasis, and stages III and IV is clearly shown (Table 1), with overall odds ratios being 2.50 [95% confidence interval (CI), 2.11–2.97], 1.83 (95% CI, 1.58–2.13), and 2.14 (95% CI, 1.79–2.56), respectively. These relationships between *BRAF* mutation and the three clinicopathological characteristics from various studies are more clearly depicted in Fig. 2, A–C. The association of *BRAF* mutation with lymph node metastasis appears to be less uniform, probably reflecting a fact that the extent of neck dissection often varied in different patients and studies. When *BRAF* mutation distribution among PTC with different disease stages is analyzed across studies that report such information, a significantly higher prevalence is seen in the advanced stages III and IV than in stages I and II (Table 2). This pattern still exists when the Korean series, which have in general reported an unusually high prevalence of *BRAF* mutation, up to 80–90% in some studies (68, 71, 91), are excluded from this analysis (Table 2). It is also important to note that *BRAF* mutation is most commonly associated with the subtypes of PTC that are classically known to be particularly aggressive. This issue was specifically examined in the Xing *et al.* study (83), which showed clearly an order of tall cell PTC > conventional PTC >> follicular variant PTC when ranked according to the prevalence of aggressive clinicopathological features of the tumor, such as extrathyroidal invasion, lymph node metastasis, advanced tumor stages III and IV, and tumor recurrence. Correspondingly, the same order of tall cell PTC > conventional PTC >> follicular variant PTC held for the prevalence of *BRAF* mutation in these subtypes of PTC (83). This close association of *BRAF* mutation with aggressive subtypes of PTC is itself strong evidence for the role of *BRAF*

mutation in determining the aggressiveness of PTC. This evidence may, in fact, suggest that *BRAF* mutation is an important, perhaps a primary, factor for the development of tall cell PTC. A recent study showed that, in comparison with conventional PTC, tall cell PTC was more aggressive (with more metastasis and recurrence) even when confounding factors were matched, including patient age, gender, tumor size, extrathyroidal extension status, therapy type, and follow-up length (92). This could be well explained by an independent pathogenic role of the *BRAF* mutation that occurs most commonly in tall cell PTC. Some studies also found a correlation of *BRAF* mutation with high-risk clinicopathological characteristics of PTC within specific subtypes, such as conventional PTC (66, 68, 71) and follicular variant PTC (74). Several studies showed that PTC components often existed in *BRAF* mutation-harboring ATC tumors and, in such cases, the PTC and ATC components usually both harbored *BRAF* mutation (76, 93–95). This suggests that *BRAF* mutation may play a role in promoting the progression of PTC to ATC. Thus, *BRAF* mutation is a driving force behind the aggressive pathological characteristics of PTC and, as will become more evident later in the discussion, predicts a poorer prognosis for patients with PTC.

#### *C. Studies with negative results*

Although most of the studies, as discussed above, support an association between *BRAF* mutation and the conventional high-risk clinicopathological factors, some studies have failed to reveal a significant association between them (58, 60, 62, 65, 70, 73, 75, 77, 78, 81, 84) (Table 1 and Fig. 2). There is no definitive explanation for these inconsistent results, but the relatively small number of cases in most of the “negative” studies seems to be one explanation. In fact, a clear tendency of association of *BRAF* mutation with poor clinicopathological characteristics was seen in some of these studies although no statistical significance was reached (Table 1 and Fig. 2). Variations in the extent of the disease at the time of the initial diagnosis (for example, PTC at an early stage with small tumor is less likely to be associated with aggressive pathological features), variations in the completeness of the pathological description of the tumor in the patient records, and variations in the criteria and protocols used for data collection may all exist among different studies and may be at least partially responsible for the inconsistent reports. Possible variations in the diagnostic criteria used by different pathologists, particularly the criteria for defining the various subtypes of PTC, could also contribute to some of the inconsistent reports. This may be true particularly given the fact that the prevalence of *BRAF* mutation varies greatly among the different subtypes of PTC, each of which is associated with different levels of aggressiveness as discussed above. In fact, in the Xing *et al.* study (83), when PTC subtypes were included in the multivariate logistic regression analysis, the association previously seen of *BRAF* mutation with some of the clinicopathological characteristics was cancelled. This result, however, may be well expected if *BRAF* mutation is a major pathogenic factor that drives the development of high-risk pathological characteristics of the aggressive subtypes, such as the tall cell PTC.

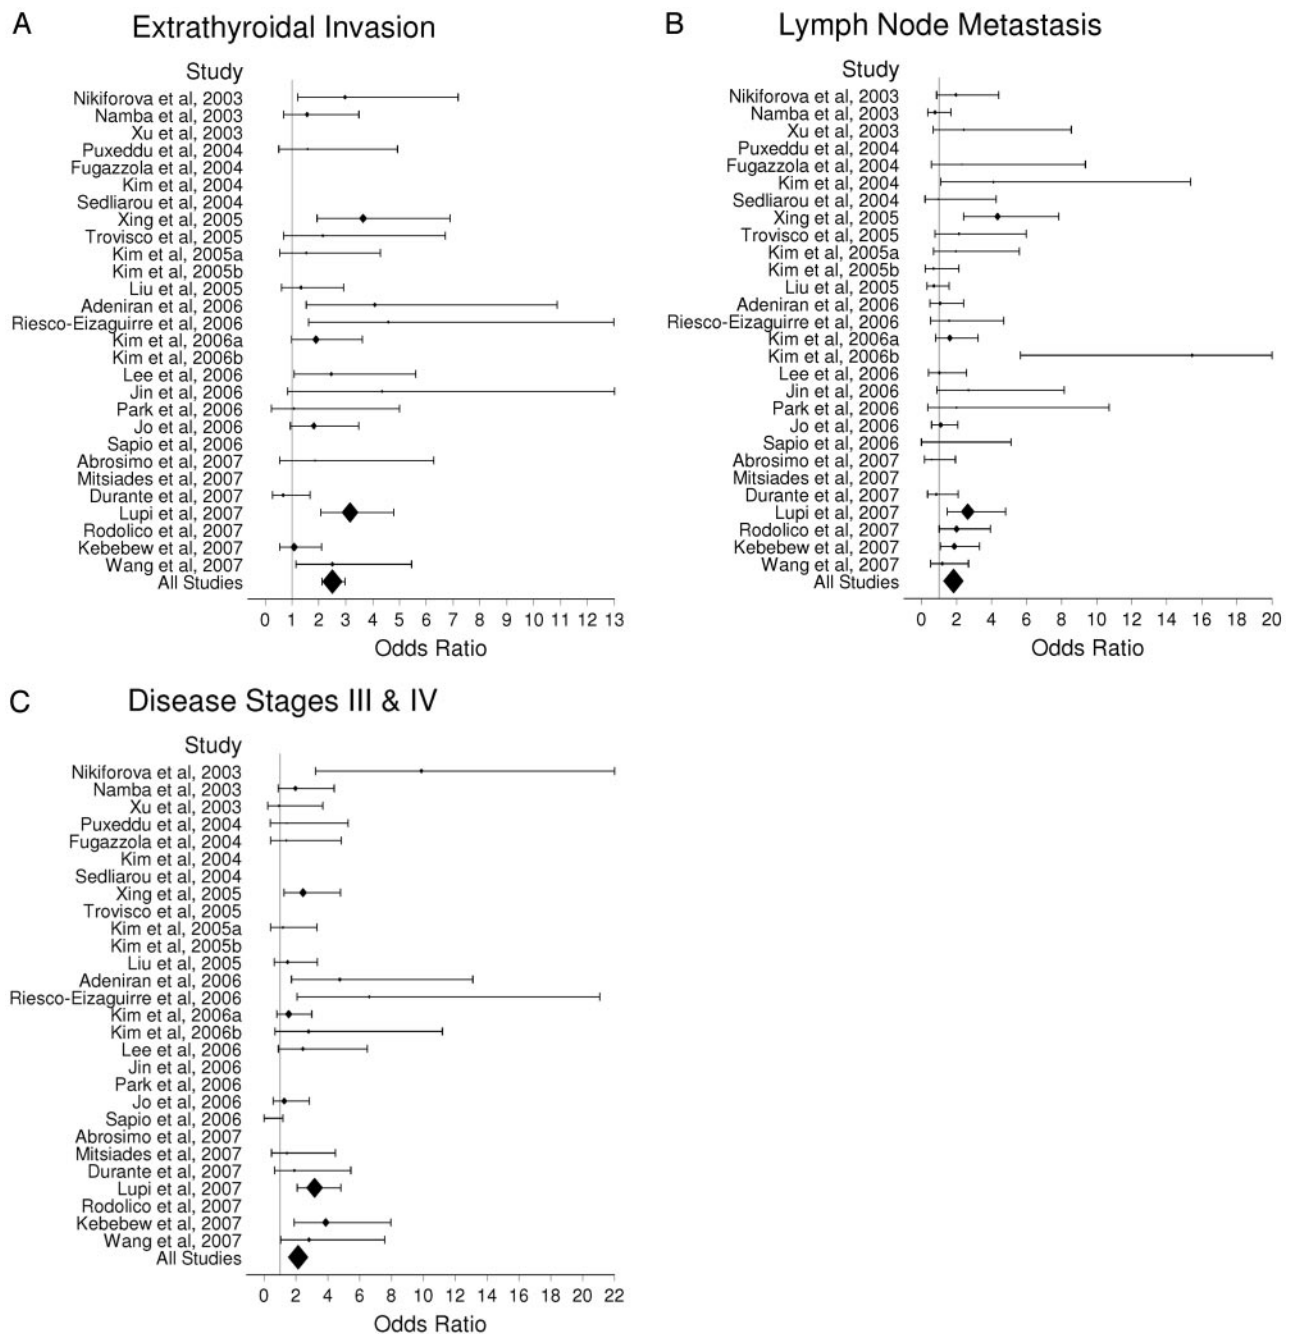

FIG. 2. Relationship of *BRAF* mutation (odds ratios) with extrathyroidal invasion (A), neck lymph node metastasis (B), and advanced stages III and IV (C) in PTC. Plotted are the data for each of the individual reports summarized in Table 1. Some reports did not provide the related data and are left blank in the figure. Shown at the bottom of each panel are the overall data added up from the individual reports that provided the related information. Kim *et al.* 2005a, Kim *et al.* 2005b, Kim *et al.* 2006a, and Kim *et al.* 2006b refer to Refs. 70, 69, 71, and 67, respectively.

### III. Association of *BRAF* Mutation with Recurrence of PTC and Loss of Radioiodine Avidity in Recurrent Tumors

#### A. Association with recurrence of PTC

The predictive value of the *BRAF* mutation for PTC recurrence has been specifically investigated in several recent studies that directly examine the relationship between *BRAF* mutation and PTC recurrence. The first large study by Xing

*et al.* (83), a multicenter investigation on 219 PTC patients, retrospectively analyzed the relationship of *BRAF* mutation in primary PTC with tumor recurrence. In addition to demonstrating the association of *BRAF* mutation with several aggressive pathological characteristics, such as extrathyroidal invasion, lymph node metastasis, advanced tumor stages, and aggressive histological subtypes, a close association of *BRAF* mutation with PTC recurrence was also demonstrated over a median clinical follow-up of 15 months. An

TABLE 2. Prevalence of *BRAF* mutation in different stages of PTC

| Study no.                | Stage         |              |                          |              |             |              | First author, year (Ref.)         |
|--------------------------|---------------|--------------|--------------------------|--------------|-------------|--------------|-----------------------------------|
|                          | I             | II           | I + II                   | III          | IV          | III + IV     |                                   |
| 1                        | 20/74 (27)    | 1/8 (13)     | 21/82 (26)               | 10/12 (83)   | 7/10 (70)   | 17/22 (77)   | Nikiforova, 2003 (76)             |
| 2                        | 5/27 (19)     | 7/27 (26)    | 12/54 (22)               | 20/61 (33)   | 6/11 (55)   | 26/72 (36)   | Namba, 2003 (40)                  |
| 3                        | 8/19 (42)     | 0/2 (0)      | 8/21 (38)                | 1/1 (100)    | 7/16 (44)   | 8/17 (47)    | Puxeddu, 2004 (78)                |
| 4                        | 10/30 (33)    | 1/1 (100)    | 11/31 (35)               | 6/12 (50)    | 1/4 (25)    | 7/16 (44)    | Fugazzola, 2004 (62)              |
| 5                        |               |              | 13/46 (28) <sup>a</sup>  |              |             |              | Sedliarou, 2004 (81) <sup>a</sup> |
| 6                        | 44/83 (53)    | 30/87 (34)   | 74/170 (44)              | 29/44 (66)   | 2/3 (67)    | 31/47 (66)   | Xing, 2005 (83)                   |
| 7                        | 18/36 (50)    | 0/0 (-)      | 18/36 (50)               | 11/22 (50)   | 2/2 (100)   | 13/24 (54)   | Kim, 2005 (70)                    |
| 8                        | 25/57 (44)    | 3/8 (38)     | 28/65 (43)               | 19/33 (58)   | 0/3 (0)     | 19/36 (53)   | Liu, 2005 (73)                    |
| 9                        | 20/62 (32)    | 1/7 (14)     | 21/69 (30)               | 9/12 (75)    | 7/11 (64)   | 16/23 (70)   | Adeniran, 2006 (59)               |
| 10                       |               |              | 5/28 (18)                |              |             | 23/39 (59)   | Riesco-Eizaguirre, 2006 (79)      |
| 11                       | 84/120 (70)   | 3/4 (75)     | 87/124 (70)              | 48/60 (80)   | 14/19 (73)  | 62/79 (78)   | Kim, 2006 (71)                    |
| 12                       | 14/62 (23)    | 15/32 (47)   | 29/94 (31)               | 1/3 (33)     | 4/6 (67)    | 5/9 (56)     | Kim, 2006 (67)                    |
| 13                       | 36/65 (55)    | 3/9 (33)     | 39/74 (53)               | 19/26 (73)   |             | 19/26 (73)   | Lee, 2006 (72)                    |
| 14                       |               |              | 33/132 (25) <sup>a</sup> |              |             |              | Ugolini, 2007 (159) <sup>a</sup>  |
| 15                       | 10/29 (35)    | 3/10 (30)    | 13/39 (33)               | 6/12 (50)    | 2/7 (29)    | 8/19 (42)    | Mitsiades, 2007 (75)              |
| 16                       | 25/47 (53)    | 3/6 (50)     | 28/53 (53)               | 4/5 (80)     | 11/17 (65)  | 15/22 (68)   | Durante, 2007 (60)                |
| 17                       | 124/357 (35)  | 9/15 (60)    | 133/372 (36)             | 81/127 (64)  |             | 81/127 (64)  | Lupi, 2007 (74)                   |
| 18                       |               |              | 88/214 (41) <sup>a</sup> |              |             |              | Rodolico, 2007 (80) <sup>a</sup>  |
| 19                       | 6/17 (35)     | 32/68 (47)   | 38/85 (45)               |              |             | 16/23 (70)   | Wang, 2007 <sup>b</sup>           |
| Overall (1) <sup>c</sup> | 449/1085 (41) | 111/284 (39) | 699/1789 (39)            | 264/430 (61) | 63/109 (58) | 366/601 (61) | $P < 0.001^e$                     |
| Overall (2) <sup>d</sup> | 297/802 (37)  | 90/239 (38)  | 526/1461 (36)            | 185/319 (58) | 43/82 (52)  | 267/463 (58) | $P < 0.001^e$                     |

Data represent number/total (percent).  
<sup>a</sup> These were cases of micro-PTC and, for convenience of analysis, are included in the category of stages “I + II” because they would usually fall into these stages.  
<sup>b</sup> Unpublished data.  
<sup>c</sup> Overall (1), overall values of all the studies.  
<sup>d</sup> Overall (2), overall values after exclusion of the Korean series (studies 6 and 10–12).  
<sup>e</sup>  $P$  value for comparison between “I + II” and “III + IV” per  $\chi^2$  test.

odds ratio of 4.0 (95% CI, 1.1–14.1;  $P = 0.03$ ) for cancer recurrence with *BRAF* mutation was obtained on multivariate analysis with adjustment for all the classical confounding clinicopathological factors, including tumor subtypes and a history of radioiodine treatment. Interestingly, such an association of *BRAF* mutation with PTC recurrence was found even in a subgroup of patients with low-grade initial clinicopathological stages I and II, which are known to be generally associated with a low risk for recurrence. This association also remained significant on multivariate analysis with the adjustment for all the known confounding clinico-

pathological risk factors. A subsequent Korean study by Kim *et al.* (71) similarly demonstrated a close association of *BRAF* mutation with tumor recurrence in a series of 203 patients with conventional PTC. Kaplan-Meier analysis of disease recurrence-free probability showed similar overall patterns in the two studies (Fig. 3). The Kim *et al.* study (71) displayed smoother survival curves, probably because it consisted of a homogeneous subject population of only Korean patients, whereas the study by Xing *et al.* (83) consisted of a less homogeneous population from four different international medical centers. Also, the Kim *et al.* study consisted of only

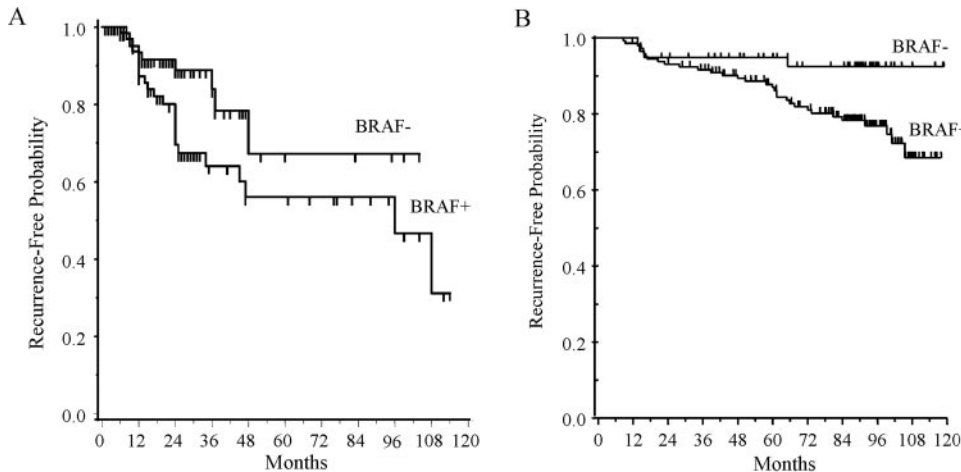

FIG. 3. Kaplan-Meier estimate of recurrence-free probability of PTC in patients with (+) or without (-) *BRAF* mutation. A, Analysis of a multicenter series consisting of 219 cases, mainly Caucasian patients. Log-rank test:  $\chi^2 = 4.0$ ,  $P = 0.04$ . [Adapted from Xing *et al.*, 2005 (83), with permission from The Endocrine Society.] B, Analysis of a Korean series consisting of 203 patients. Log-rank test:  $\chi^2 = 4.60$ ,  $P = 0.037$ . [Adapted from Kim *et al.*, 2006 (71), with permission from Wiley–Blackwell.]



conventional PTC, whereas the Xing *et al.* study consisted of three different PTC subtypes: conventional, tall cell, and follicular variant PTC. The disease-free probability curves declined more slowly in the Kim *et al.* study than in the Xing *et al.* study, reflecting the overall lower disease extent of the patients in the former study. A recent Spanish study by Riesco-Eizaguirre *et al.* (79) also demonstrated a strong association of *BRAF* mutation with the recurrence of PTC. Even in a relatively small Italian study on 47 cases of PTC, a tendency of association of *BRAF* mutation with PTC recurrence was shown, although it did not reach statistical significance (62) (Table 3). More recently, in a large American study on PTC, Kebebew *et al.* (66) also demonstrated a significant association of *BRAF* mutation with recurrence or disease persistence of PTC. Similar to the Kim *et al.* study (71), the Kebebew *et al.* study (66) could show a significant role of *BRAF* mutation in PTC recurrence when only conventional PTC were examined. Confirming the findings by Xing *et al.* (83), Kebebew *et al.* (66) also showed an independent association of *BRAF* mutation with PTC recurrence on multivariate analysis with adjustment for the classical clinicopathological confounding factors. As demonstrated in the Xing *et al.* study (83), Kebebew *et al.* (66) also showed a significant association of *BRAF* mutation with PTC recurrence even in low-stage (stage I) PTC. Although the median follow-up time, geographical regions, and ethnic backgrounds of the patients were very different among these studies, the pattern of the relationship of *BRAF* mutation with PTC recurrence was very similar (Table 3). Therefore, regardless of the risk level associated with the preexisting clinicopathological, geographical, and ethnic factors, *BRAF* mutation seems to add an incremental risk for disease recurrence of PTC. The overall odds ratio from five studies for this risk of PTC recurrence associated with *BRAF* mutation is 2.65 (95% CI, 1.77–3.96;  $P < 0.001$ ) (Table 3).

#### B. Association with loss of radioiodine avidity in recurrent PTC

The mainstay of current medical treatment for PTC after thyroidectomy is radioiodine ablation therapy (7, 8). Effective medical treatment of recurrent PTC is also largely confined to radioiodine therapy. However, thyroid cancer may lose radioiodine avidity, a major cause for radioiodine treatment failure and associated increased morbidity and mortality (7, 8, 96). This can be illustrated by the case of a PTC patient who has initially been treated with radioiodine ab-

lation therapy for apparently radioiodine-sensitive primary PTC after thyroidectomy and later develops a recurrent tumor that becomes radioiodine-resistant and continues to progress. Although various clinicopathological factors are known to be associated with increased risk for recurrence of thyroid cancer, no factor has been known to predict loss of radioiodine avidity in the recurrent tumor. The study by Xing *et al.* (83) showed an interesting association of *BRAF* mutation in the primary PTC with loss of radioiodine avidity in the recurrent tumor. The recurrent PTC in the patients with primary tumors harboring *BRAF* mutation required more aggressive treatments, including the need for surgeries and external radiation therapy, than the recurrent tumors in the patients without *BRAF* mutation, which mostly only required repeated radioiodine treatment (83). In many cases in the former group the treatment for the recurrent tumor failed and the patients continued to have persistent disease, whereas the patients in the latter group were all cured for their recurrent tumor, usually with only one repetition of the radioiodine therapy. A tendency of association of *BRAF* mutation in the primary or recurrent PTC with loss of radioiodine avidity in the recurrent tumor was observed in two more recent studies, although it did not reach statistical significance, probably due to the relatively small number of cases studied (79, 97).

Pediatric PTC is highly curable and rarely recurs if appropriate surgery with adjunctive radioiodine ablation is used, even if the initial disease is extensive and associated with extrathyroidal invasion, lymph node metastasis, or even lung metastasis (98, 99). This is largely because pediatric thyroid cancer is virtually always differentiated and sensitive to radioiodine treatment. Interestingly, this echoes the fact that *BRAF* mutation rarely occurs in pediatric PTC, a population in which *RET/PTC* rearrangement is the major genetic alteration in PTC (13, 27, 28). It appears that when *BRAF* mutation does occur in pediatric PTC, the tumor tends to be de-differentiated and the prognosis is potentially poorer (100). Therefore, *BRAF* mutation-promoted loss of radioiodine avidity may be an important cause for the failure or inefficiency of radioiodine treatment and, hence, a cause for both the progression and recurrence of PTC, although other mechanisms may also exist. Strong molecular bases have now been revealed for this phenomenon. These include the silencing of thyroid iodide-metabolizing genes, which occurs more profoundly with *BRAF* mutation than with *RET/PTC* as will be discussed in Section IV.

TABLE 3. Recurrence of PTC with (+) or without (–) *BRAF* mutation

| Primary patient group | <i>BRAF</i> mutation (+) | <i>BRAF</i> mutation (–) | Median follow-up time (months) | OR (95% CI)       | <i>P</i> value <sup>a</sup> | First author, year (Ref.)       |
|-----------------------|--------------------------|--------------------------|--------------------------------|-------------------|-----------------------------|---------------------------------|
| Italian               | 5/18 (28)                | 5/29 (17)                | ?                              | 1.85 (0.45–7.57)  | 0.39                        | Fugazzola, 2004 (62)            |
| American              | 23/92 (25)               | 9/96 (9)                 | 15                             | 3.37 (1.47–7.74)  | 0.004                       | Xing, 2005 (83)                 |
| Korean                | 32/149 (21)              | 4/54 (7)                 | 88                             | 3.42 (1.15–10.18) | 0.02                        | Kim, 2006 (71)                  |
| Spanish               | 9/28 (32)                | 3/39 (8)                 | 36                             | 5.68 (1.37–23.52) | 0.01                        | Riesco-Eizaguirre, 2006 (79)    |
| American              | 38/111 (34)              | 18/98 (18)               | 72                             | 2.31 (1.21–4.41)  | 0.01                        | Kebebew, 2007 (66) <sup>b</sup> |
| Overall               | 107/398 (27)             | 39/320 (12)              |                                | 2.65 (1.77–3.96)  | <0.001                      |                                 |

Data represent number/total (percent), unless specified otherwise. OR, Odds ratio.

<sup>a</sup> *P* value per  $\chi^2$  test.

<sup>b</sup> The raw data were provided by Dr. Electron Kebebew through a personal communication, which was not directly reported in the original publication [Kebebew *et al.*, 2007 (66)].



#### IV. Molecular Bases for *BRAF* Mutation-Promoted Invasiveness and Progression of PTC

##### A. Unique role of *BRAF* mutation in thyroid tumorigenesis

The tumorigenic ability of *BRAF* mutation was elegantly demonstrated in transgenic mice that developed PTC upon targeted expression of the *BRAF* V600E protein in the thyroid gland (101). PTC developed in these animals progressed naturally into poorly differentiated tumors that showed a high frequency of invasion into blood vessels and surrounding tissues, recapitulating the clinicopathological findings on this mutation in human PTC. Studies in rat thyroid cell lines showed that *BRAF* V600E promoted matrigel invasion of thyroid cells (30, 102). Matrigel matrix used in this assay is a polymerized basement membrane which is rich in extracellular matrix proteins and mimics physiological conditions for cells to grow on. Migration of cancer cells across matrigel membrane is a commonly used measure to test the invasiveness of cancer cells. *BRAF* inhibitors could inhibit the growth and proliferation of cells harboring *BRAF* V600E (103). In *BRAF* mutation-harboring human PTC-derived cells, transient transfection with small interfering RNA (siRNA) to knock down *BRAF* inhibited cell growth and proliferation (104). Stable siRNA transfection of *BRAF* mutation-harboring PTC cells resulted in persistent suppression of *BRAF*, sustained the inhibition of cell proliferation, prevented transformation even after long-term culture, and inhibited xenograft tumor growth in nude mice (105). These results all strongly support the idea that *BRAF* mutation not only can initiate tumorigenesis of PTC but is also required to maintain and promote the progression of PTC.

The activating genetic alterations in the MAPK pathway, including *RET/PTC* rearrangement, *Ras* mutation and *BRAF* mutation, are mutually exclusive in PTC (13, 39, 41, 90, 106). *BRAF* mutation is also mutually exclusive with aberrant hypermethylation and the silencing of a major tumor suppressor gene, *RASSF1A* (ras-associated factor 1), in PTC (107). These data suggest that each of these genetic alterations in PTC may be sufficient on its own to drive PTC tumorigenesis. It remains, then, an apparently confusing issue why *BRAF* mutation is associated with increased aggressiveness and recurrence of PTC when compared with other genetic alterations related to the MAPK pathway, such as *RET/PTC*, the second most common genetic alteration in PTC. The answer may lie in the difference in the oncogenic strength of these genetic alterations and the molecular events coupled to them in the cell. For example, induced expression of *BRAF* V600E in rat thyroid cells uniquely caused genetic instability, but the expression of *RET/PTC* did not (108), suggesting that secondary genetic alterations may occur after *BRAF* mutation and that these alterations may play a special role in determining the progression and aggressiveness of *BRAF* mutation-induced PTC. Markedly increased matrigel cell invasion was also seen with induced expression of *BRAF* V600E, but not *RET/PTC*, in these cells (102). A previous study demonstrated that conditional expression of *RET/PTC* induced only a weak oncogenic drive in thyroid PCCL3 cells (109). In microarray gene expression analyses, different gene expression patterns were seen with induced expression of

*BRAF* V600E and *RET/PTC* in rat thyroid cells (30, 102), suggesting a difference in the genes affected by the two genetic alterations. These cell line studies also suggest that *BRAF* mutant is probably a stronger activator of the MAPK pathway than *RET/PTC*. In human PTC tumor tissues, different gene expression profiles were also found to be differentially associated with *BRAF* mutation, *RET/PTC*, and *Ras* mutation (110). From all these studies it is convincing that molecular events that are coupled to *BRAF* V600E and are not shared or not sufficiently driven by other genetic alterations may be responsible for the tumor aggressiveness uniquely associated with *BRAF* mutation in PTC. *Ras* mutation was shown to be associated with poorly differentiated or undifferentiated thyroid cancers in one study on patients (111) and one study on a transgenic mouse model (112), but no comparison could be made with *BRAF* mutation in these studies. In fact, in a study by Adeniran *et al.* (59) comparing the relationships of different genetic alterations with clinicopathological characteristics of PTC, *BRAF* mutation was far more commonly seen than *Ras* mutation to be associated with high-risk clinicopathological characteristics, such as extrathyroidal invasion, lymph node metastasis, and advanced tumor stages III and IV. The *Ras* mutation occurs most commonly in FTC and follicular variant PTC and is virtually absent in nonfollicular variant PTC (59, 113–115). Therefore, *Ras* mutation may naturally not have a major impact on the tumorigenesis and prognosis of nonfollicular variant PTC.

##### B. *BRAF* mutation-associated aberrant methylation and silencing of tumor suppressor genes

Recent studies have demonstrated a close association of *BRAF* mutation with aberrant methylation of several important tumor suppressor genes in PTC, including the genes for tissue inhibitor of matrix metalloproteinase-3 (TIMP3), death-associated protein kinase (DAPK), SLC5A8, and retinoic acid receptor  $\beta$ 2 (RAR $\beta$ 2) (116–118). Expression level of SLC5A8 was particularly examined in PTC in some studies and found to be inversely related to *BRAF* mutation (60, 118). Hypermethylation-induced silencing of these genes is associated with tumor progression and aggressiveness in many human cancers (119–124). Interestingly, *BRAF* mutation-associated methylation of these tumor suppressor genes was also correlated with several high-risk clinicopathological characteristics of PTC, including extrathyroidal invasion, lymph node metastasis, and advanced stages III and IV (117). The association of *BRAF* mutation with methylation of tumor suppressor genes was selectively concurrent in several genes in PTC (117), reminiscent of the phenomenon of “CpG island methylator phenotype (CIMP)” proposed for colorectal and other cancers, in which hypermethylation of CpG islands in specific groups of genes distinguishes specific phenotypes of the tumor (125, 126). As in PTC, this CIMP phenomenon was found to be tightly associated with *BRAF* mutation in colorectal cancers (126). It has been recently proposed that the silencing of major tumor suppressor genes in a CIMP-like manner may play an important role in *BRAF* mutation-promoted tumorigenesis and progression of PTC (127). TIMP3 is a particularly interesting tumor suppressor in this regard because it suppresses tumor growth, angiogenesis, invasion,

and metastasis both by preventing the interstitial matrix destruction promoted by matrix metalloproteinase (MMP)-3 (128) and by blocking the binding of vascular endothelial growth factor (VEGF) to the VEGF receptor (129). VEGF is a strong angiogenic protumor molecule that plays a critical role in human cancer progression and invasion (130). Therefore, methylation-mediated silencing of the *TIMP3* gene may play a unique role in *BRAF* mutation-promoted invasiveness and progression of PTC. Recently, *BRAF* mutation was reported to be associated with alterations in the expression of various micro-RNAs in PTC (131, 132). Micro-RNAs are short noncoding single-stranded RNA molecules that regulate gene expression and cell growth and, by functioning as oncogenes or tumor suppressor genes, play an important role in tumorigenesis (133). Of particular interest is the *BRAF* mutation-associated down-regulation of certain micro-RNAs in PTC that appeared to have tumor-suppressor function (132). This newly emerging area awaits to be explored further in thyroid cancer, which may lead to discovery of novel molecular mechanisms in *BRAF* mutation-promoted thyroid tumorigenesis. It would be particularly interesting to see whether alteration in the expression of micro-RNAs in association with *BRAF* mutation is related to the change in genomic DNA methylation.

### C. Up-regulation of tumor-promoting molecules by *BRAF* mutation

Interestingly, a recent study demonstrated overexpression of VEGF in association with *BRAF* mutation in PTC (65). Therefore, the dual angiogenic effects of *BRAF* V600E through promoting methylation-induced silencing of *TIMP3* and VEGF overexpression in PTC represent a unique molecular mechanism underlying *BRAF* mutation-induced progression and invasiveness of PTC. This mechanism may be particularly involved in *BRAF* mutation-promoted extrathyroidal invasion and metastasis of PTC, which involves vigorous angiogenesis and tissue invasion. This is consistent with the fact that extrathyroidal invasion, most commonly and closely associated with *BRAF* mutation in PTC (Table 1 and Fig. 2A), is one of the most important clinicopathological characteristics associated with a poorer prognosis for patients with PTC.

Overexpression of several MMPs, including MMP3, was induced upon expression of *BRAF* V600E in thyroid cell lines (30, 102, 134), providing further support for a role of the MMP system in mediating *BRAF* mutation-promoted progression of PTC. MMP molecules, as exemplified by MMP3, promote tumor progression and metastasis by facilitating angiogenesis and the destruction of interstitial matrix (135). In the study by Palona *et al.* (134) that demonstrated induction of MMPs by V600E in thyroid cells, the authors also showed that *BRAF* V600E promoted activation of the nuclear transcription factor  $\kappa$ B (NF- $\kappa$ B)-coupled signaling, which in turn promoted matrigel invasion of thyroid cancer cells. Many studies have shown that the NF- $\kappa$ B pathway promotes apoptosis resistance, cell proliferation, angiogenesis, invasion, and metastasis of human cancers (136). Thus, the NF- $\kappa$ B system may be another important pathway involved in *BRAF* mutation-mediated progression and aggressiveness of PTC.

Interestingly, in the study by Palona *et al.* (134), *BRAF* V600E-promoted activation of NF- $\kappa$ B system seemed to take place through signaling directly from *BRAF*, independently of the down-stream MEK/MAPK/ERK signaling.

In comparison with *RET/PTC* or *Ras* mutation, *BRAF* mutation was also shown to be associated with markedly up-regulated expression of c-Met in PTC (110). The c-Met protein is a cell surface receptor tyrosine kinase that, through activation by binding with hepatocyte growth factor, stimulates mitogenesis of a wide range of cells and promotes oncogenesis, tumor progression and aggressiveness, and metastasis in several human cancers (137). Increased expression of c-Met was previously demonstrated in PTC (138). In fact, expression of c-Met in tall cell PTC was shown to be significantly higher than that in conventional PTC or follicular variant PTC (139), consistent with the patterns of *BRAF* mutation distribution and aggressiveness of the three subtypes of PTC (83). Expression of c-Met was also highly associated with extrathyroidal invasion and lymph node metastasis of PTC (139), mimicking the association pattern of *BRAF* mutation with these high-risk pathological characteristics of PTC (Table 1 and Fig. 2). Therefore, c-Met may be involved in *BRAF* mutation-promoted aggressiveness of PTC.

### D. Silencing of thyroid iodide-metabolizing genes in PTC

The efficacy of radioiodine treatment for thyroid cancer depends on the ability of cancer cells to take up and accumulate radioiodine, which in turn relies on the integrity of the iodide-metabolizing system of the thyroid cell (140). The process involves the sodium/iodide symporter (NIS) in the basal membrane of the thyroid cell that transports iodide into the cell from the blood stream. Iodide is in turn transported into the thyroid follicle through the putative iodide transporter SLC26A4 (pendrin) (141) and possibly other undefined transporters in the apical membrane of the thyroid cell. In the follicle, iodide is oxidized by thyroperoxidase (TPO) and incorporated into tyrosine residues in the thyroglobulin (Tg) molecule to form thyroid hormone. TSH receptor (TSHR) plays a pivotal role in regulating this process, including up-regulation of the molecules involved in this process. Expression of these thyroid iodide-metabolizing genes is often impaired or lost in thyroid cancer (142–145). Interestingly, *BRAF* mutation was found to be associated with decreased expression of TPO (60, 97, 110, 146), NIS (60, 79), Tg (60), and pendrin (97) in primary or recurrent PTC tumors. Conditional expression of *BRAF* V600E in rat thyroid cell lines led to silencing of all these thyroid-specific iodide-metabolizing genes (79, 108, 147). Cessation of expression of *BRAF* V600E or inhibition of the MAPK pathway using inhibitors or *BRAF* siRNA could restore the expression of these and other thyroid genes (79, 147). Methylation was shown to be a mechanism mediating the silencing of some of these thyroid genes. For example, two previous studies demonstrated that the *TSHR* gene was silenced in a promoter methylation-dependent manner in rat thyroid cell lines (148, 149). This was similarly demonstrated in human thyroid cancer cells (150, 151). It was recently demonstrated that in human thyroid cancer cells, *BRAF* V600E-induced silencing of *TSHR* gene involved aberrant promoter methylation of this gene

partially through increased expression of DNA methyltransferases (147). Interestingly, expression of *BRAF* V600E impaired not only the expression of NIS protein but also its targeting to the cell membrane (60, 79). Thus, these studies provide a clear molecular explanation for the clinically observed association of *BRAF* mutation with the loss of radioiodine avidity in recurrent PTC (83). Because these thyroid-specific molecules are well-known differentiation markers of thyroid cells, their loss represents progression of thyroid cancer toward dedifferentiation. In this sense, the results on *BRAF* mutation-associated silencing of thyroid-specific genes are consistent with the notion that *BRAF* mutation promotes progression and aggressiveness of PTC.

Overexpression of RET/PTC or activating Ras mutant could also decrease the expression of thyroid iodide-metabolizing genes in thyroid cell lines (29). These oncoproteins, like the *BRAF* mutant, all lie in the MAPK pathway. It may then appear to be puzzling why *BRAF* mutation is preferentially associated with impaired radioiodine avidity in PTC tumors (83). As discussed in Section IV.A for the differential role of *BRAF* mutation among different genetic alterations in PTC aggressiveness, the answer may again lie in different oncogenic strength and molecular events coupled to these genetic alterations. For example, compared with RET/PTC and Ras mutation, *BRAF* mutation was far more profoundly associated with decrease in TPO expression in primary PTC tumors (110). It is also important to note that the correlation of *BRAF* mutation with abnormalities of the thyroid iodide-metabolizing machinery in PTC tumors, such as decreased expression of iodide-metabolizing genes (60, 79, 97, 110, 146) or decreased radioiodine avidity (79, 83, 97), was established by comparing two groups of PTC: *BRAF* mutation-negative and *BRAF* mutation-positive. The *BRAF* mutation-negative group of PTC in these studies conceivably harbored other relatively common MAPK pathway-related genetic alterations, such as RET/PTC, albeit showing less severe abnormalities, consistent with a weaker effect of these genetic alterations than *BRAF* mutation on iodide-metabolizing genes.

## V. Testing of *BRAF* Mutation as a Potentially New Dimension to Risk Stratification and Clinical Management of PTC

### A. *BRAF* mutation as a novel prognostic molecular marker for PTC

As evidenced by the strong data discussed above, from both the clinicopathological and the molecular biological perspectives, it is convincing that *BRAF* mutation is intrinsically associated with increased progression and aggressiveness of PTC. This mutation, therefore, may represent a novel and useful prognostic molecular marker for PTC. There has not been a useful molecular marker that, like *BRAF* mutation, has been extensively studied for the prognostic value in the management of thyroid cancer. Like several conventional clinicopathological factors, particularly extrathyroidal invasion, lymph node metastasis, and disease stages III and IV (6), *BRAF* mutation similarly has a high predictive value for PTC recurrence (66, 71, 79, 83) (Table 3).

It is important to note that multivariate analysis with adjustment for all the conventional confounding clinicopathological factors showed an independent predicting power of *BRAF* mutation for PTC recurrence (66, 83). Therefore, *BRAF* mutation is not simply a good surrogate marker for the conventional clinicopathological factors, but may actually add an incremental risk to that associated with the conventional factors for PTC recurrence. Because *BRAF* mutation is highly associated with extrathyroidal invasion and advanced tumor stages III and IV (Table 1), which are themselves associated with a higher mortality of PTC (6), *BRAF* mutation is likely to be associated with an increased mortality of PTC. This possibility is consistent with the ability of *BRAF* mutation to promote the silencing of several major tumor suppressor genes, the up-regulation of several protumor and proangiogenesis molecules, and the dedifferentiation and loss of radioiodine avidity of PTC. Given the generally indolent nature of PTC, however, a long-term analysis, either retrospectively or prospectively, is needed to directly address the impact of *BRAF* mutation on PTC-associated mortality. Even given the lack of such data on mortality at this time, the high predicting value of *BRAF* mutation for PTC recurrence alone makes it tempting to apply this novel prognostic molecular marker to the clinic, where it would add a new dimension to the standard risk stratification of PTC, which is currently solely based on clinicopathological criteria.

### B. Potential utility of *BRAF* mutation in guiding medical management of PTC

With this new dimension added to the current risk assessment and stratification of PTC, it is possible to medically manage patients with PTC more appropriately. Although more data, and perhaps a consensus on how specifically to use *BRAF* mutation in planning the treatment of thyroid cancer, may be needed, it can be expected that this novel prognostic factor may affect the current medical management of patients with PTC principally in two ways. In the first, it may assist in deciding how aggressive the initial treatment of the patient should be. Patients with *BRAF* mutation may need to be treated more aggressively, perhaps with more extensive thyroid surgeries (to be discussed further in Section V.C) followed by a more liberal (both in terms of patient selection and dosage) use of radioiodine ablation therapy. Because the *BRAF* mutation is associated with decreased expression of iodide-metabolizing genes and impaired radioiodine avidity of PTC, perhaps a higher initial dose of radioiodine should be used to treat *BRAF* mutation-positive patients. This “initial hard-hit” approach guided by *BRAF* mutation status may eliminate PTC cells more efficiently in the first place and therefore reduce the chance of later recurrence. In the second, information on *BRAF* mutation may assist in deciding how vigilantly and aggressively patients should be managed after the initial treatment. PTC patients with *BRAF* mutation may need to be more closely monitored by a more liberal battery of diagnostic tests, such as more aggressive use of imaging methods. Due to the impairment or loss of radioiodine avidity in recurrent PTC associated with *BRAF* mutation, a higher dose of radioiodine



might be needed for diagnostic imaging studies or ablation treatments for recurrent PTC in these patients. The presence of *BRAF* mutation may also help physicians to be prepared for the greater likelihood of radioiodine treatment failure in these patients. In this context, in an appropriate clinical setting, it may be reasonable to use imaging studies such as positron emission tomography scan more liberally to monitor a *BRAF* mutation-positive PTC patient who has a negative diagnostic radioiodine body scan. This idea is supported by the recent demonstration that *BRAF* mutation was associated with increased expression of GLUT-1 in PTC (60, 97). GLUT-1 is a glucose transporter whose function to transport radiotracer-labeled glucose into cancer cells is a basis for positron emission tomography scan. Knowledge of a patient's *BRAF* mutation status, in conjunction with other clinical factors, may also be helpful in determining whether radioiodine treatment should be pursued at all and whether other treatment modalities, such as surgery or external beam radiation, should be opted for at an early stage instead.

#### C. Value of preoperative testing of *BRAF* mutation on fine-needle aspiration biopsy in patients with PTC

As a stable DNA molecular marker, *BRAF* mutation can be easily detected on common DNA specimens, even in low quantities, such as those obtained from thyroid fine-needle aspiration biopsy (FNAB) (13, 64, 91, 152, 153). The diagnostic sensitivity of *BRAF* mutation testing alone is low for cytologically indeterminate thyroid nodules, which consist mainly of follicular thyroid tumors, including follicular adenoma, follicular thyroid cancer, and follicular variant PTC, which do not or only rarely harbor *BRAF* mutation (13). However, the accuracy of detection of *BRAF* mutation for PTC is high on FNAB specimens (13). Therefore, although *BRAF* mutation testing alone may not be a sufficiently sensitive diagnostic tool for the evaluation of thyroid nodules in general, it is tempting to propose that, for prognostic purpose, perhaps all patients with cytologically diagnosed PTC should be preoperatively tested for *BRAF* mutation on their FNAB specimens. Preoperative knowledge of *BRAF* mutation may be helpful to surgeons in defining the appropriate surgical strategy, such as lobectomy *vs.* total thyroidectomy and lymph node dissection *vs.* no dissection. It has been well demonstrated that aggressive surgery with careful neck lymph node examination and dissection can effectively decrease the chance of cancer recurrence (154, 155). On the other hand, however, the risk of surgical complications may also rise with aggressive neck surgeries. Because *BRAF* mutation is particularly associated with extrathyroidal invasion, lymph node metastasis, and local recurrence in the neck, preoperative knowledge of *BRAF* mutation may help surgeons better balance benefit and risk in determining the aggressiveness of neck dissection. This approach may help reduce the recurrent rate of PTC while avoiding an increase in complications. Preoperative knowledge of *BRAF* mutation may also be helpful to endocrinologists in planning the aggressiveness of medical management at an early stage, even before surgery. It will have to be seen whether this preoperative testing of *BRAF* mutation on FNAB specimens can

prove to be sufficiently useful to become a routine clinical practice in treating PTC patients.

#### D. Special usefulness of *BRAF* mutation in the management of conventionally low-stage PTC

As discussed above, thyroid cancer stages III and IV are associated with a high rate of recurrence and increased morbidity and mortality (6–8). In contrast, PTC patients with stages I and II mostly have small tumors, which are generally associated with a good prognosis. However, even in this low-grade group of PTC patients, high-risk pathological characteristics, such as neck lymph node metastasis, are associated with a higher incidence of recurrence (156). PTC in a subgroup of these patients seems to be bound to recur and progress, and conventional clinicopathological evaluation cannot identify this risk (3, 18). Because the rising incidence of thyroid cancer in recent years is largely attributed to the increased diagnosis of small PTC (1, 2), it has become increasingly challenging to tailor the aggressiveness of treatment for thyroid cancer patients with low stages solely on the basis of clinicopathological criteria (3, 18). Testing of *BRAF* mutation may thus have a special value in helping identify those patients from this group that are likely to have a recurrence. This notion is strongly supported by the finding that *BRAF* mutation was independently associated with a higher rate of recurrence of PTC even in patients with low-grade stage I and II disease (66, 83). In fact, the Xing *et al.* (83) study showed the odds ratio for PTC recurrence with *BRAF* mutation on the multivariate analysis in this conventionally low-risk group of patients to be 11.6 (95% CI, 2.2–62.6;  $P = 0.004$ ), representing an even more significant predictive power of *BRAF* mutation for PTC recurrence within this subgroup than was seen in the analysis of the whole series (odds ratio of 4.0; 95% CI, 1.1–14.1;  $P = 0.03$ ). The recent Korean study by Kim *et al.* (71) that showed a significant predicting power of *BRAF* mutation for PTC recurrence consisted of patients mostly with low-risk clinicopathological stages. These results on clinical outcomes are consistent with the recent pathological data in a large study by Lupi *et al.* (74) showing that even in micro-PTC *BRAF* mutation was significantly associated with extrathyroidal invasion, high tumor stage, and lack of tumor capsule. It is thus highly probable that, if *BRAF* mutation proves to be a clinically useful prognostic marker in PTC, it will have a special value in helping appropriately manage PTC patients with low-grade stages. To put this in a practical perspective, perhaps one could use *BRAF* mutation to help determine the need for radioiodine ablation treatment and more vigilant follow-up. Because *BRAF* mutation is associated with impairment of iodide metabolism in PTC, a relatively aggressive dose of radioiodine for ablation therapy might be reasonable for *BRAF* mutation-positive patients even with disease of low stages. The benefit of TSH suppression therapy is often controversial in low-risk thyroid cancer patients (7, 8, 157). Although TSH suppression therapy may not have significant impact on the overall recurrence of thyroid cancer in patients with stages I and II (158), it would be interesting to see whether for the subgroup of these patients that are positive for *BRAF* mutation it is beneficial to pursue aggressive TSH

suppression. A low *BRAF* mutation prevalence of about 30% was reported in most series on micro-PTC or PTC with stages I and II (Table 2). An even lower prevalence (17%) of *BRAF* mutation was reported in micro-PTC of several millimeters in size that were incidentally found on histological examination of the thyroid gland (159). This relatively low prevalence of *BRAF* mutation was seen with stages I and II PTC in most regions in the world except for certain regions, such as Korea, where *BRAF* mutation is generally reported to be extremely prevalent (68, 71, 91) (Table 2). Therefore, it appears to be reasonable and perhaps economically affordable to more aggressively manage only the one third of PTC patients with stages I and II that are positive for *BRAF* mutation in regions where the prevalence of this mutation is not too high (Table 2).

## VI. *BRAF* Mutation and Related Signaling Pathways as Novel Therapeutic Targets for Thyroid Cancer

### A. *MAPK* pathway as a major therapeutic target

Because *RET/PTC*, *Ras* mutation, and *BRAF* mutation are all oncogenic activators of the *MAPK* pathway and together occur in the majority of cases of PTC (39, 41, 83, 90, 106), the *MAPK* pathway plays a major role in tumorigenesis and progression of PTC, as evidenced in the clinicopathological and molecular studies discussed above. Consequently, the *MAPK* pathway is a potentially effective therapeutic target for PTC (160, 161). Much work has been done in recent years to investigate the therapeutic potential of suppressing this pathway in human cancers (22, 24, 25). For thyroid cancer, recent effort has been particularly directed toward testing the therapeutic potential of knocking down the *MAPK* pathway signaling aberrantly activated by *BRAF* mutation. One such example is the demonstrated inhibition of proliferation of *BRAF* mutation-harboring thyroid cancer cells by Raf kinase inhibitors AAL-881 and LBT-613 (103). This inhibition was associated with  $G_1$  arrest and induction of cell death and was seen both in cell lines and in xenograft tumors. Although these *BRAF* inhibitors may be reasonably toxic enough to prevent their clinical development (51), the data provide implications that specific targeting of *BRAF* itself may be therapeutic for *BRAF* mutation-harboring thyroid cancers. This idea is also supported by the demonstration that specific knockdown of *BRAF* by transient siRNA transfection inhibited the proliferation of thyroid cancer cells harboring *BRAF* mutation (104). Stable knockdown of *BRAF* using stable siRNA transfection persistently suppressed the proliferation of *BRAF* mutation-harboring thyroid cancer cells even after long-term culture (105). Stable *BRAF* siRNA transfection also suppressed the transformation of thyroid cancer cells and the growth of xenograft tumors harboring *BRAF* mutation (105). Differentiation of thyroid cancer cells harboring *BRAF* mutation as reflected by reexpression of some thyroid-specific genes was induced by stable siRNA knockdown of *BRAF* as well (147). Thus, these studies all strongly support the therapeutic potential of suppressing *BRAF*/*MAPK* signaling for *BRAF* mutation-harboring PTC. The widely studied BAY 43-9006 compound was initially developed as a Raf kinase inhibitor (162) and has been recently demonstrated to have

effective antitumor activity in renal cancers in both phase II and phase III clinical trials (163). However, a recent phase II clinical trial on this drug showed little or no antitumor activity in melanoma (164), which harbors *BRAF* mutation with the highest prevalence among all human cancers (33). In particular, this study showed no correlation between *BRAF* mutation and disease stability. This may reflect the fact that BAY-43-9006 is now known to be a multikinase inhibitor, with high potency particularly for C-Raf and various tyrosine kinases (162, 165). As an inhibitor of tyrosine kinases, which are usually associated with the cell membrane upstream of *BRAF*, Bay-43-9006 may not have sufficient impact on mutant *BRAF*-activated *MAPK* pathway signaling. However, a recent preclinical study did show inhibitory effect of this compound on *BRAF* mutation-harboring thyroid cancer cell lines and tumor xenografts (104). It is possible, though, that these cells harbored aberrantly activated signaling pathways, aside from *BRAF*, in which tyrosine kinases played a significant role. This possibility could explain the responsiveness of the cells to Bay-43-9006. From the current understanding of the molecular mechanisms involved in *BRAF* mutation-promoted PTC tumorigenesis, it cannot be predicted whether Bay-43-9006 will be effective in treating *BRAF* mutation-harboring PTC as a single therapy. It seems to be more likely that BAY 43-9006, as a potent multityrosine kinase inhibitor, will be an effective drug for *RET/PTC*-harboring PTC because *RET/PTC* is a constitutively activated tyrosine kinase. This notion is supported by a recent study demonstrating potent inhibition of *RET/PTC*-transfected NIH3T3 cells and PTC cells that naturally harbored *RET/PTC* by this compound (104, 166). For *BRAF* mutation-harboring thyroid cancers, targeting the downstream MEK in the *MAPK* pathway with specific inhibitors may prove to be an effective alternative approach. Several specific and potent MEK inhibitors have been developed in recent years and are now available for clinical trials as will be discussed in Section VI.B.

### B. *MEK* inhibitors as highly promising therapeutic agents for thyroid cancer

Great efforts have been made in recent years to develop strategies targeting MEK with anticancer drugs to suppress the *MAPK* pathway signaling (22, 25, 167–170). Much of what is known about the clinical potential of MEK inhibitors has been from the studies of CI-1040 compound, the first MEK inhibitor to enter clinical trials. CI-1040 is a potent small-molecule MEK-selective inhibitor, which inhibits both MEK-1 and MEK-2, and was first demonstrated to inhibit colon tumor growth in mice several years ago (171). Subsequent studies have demonstrated the inhibitory effects of this compound on human cancer cell lines and animal tumor models of diverse origins (172–175). Phase I (176) and phase II (177) clinical trials on CI-1040 have been recently completed on patients with various advanced cancers, including non-small-cell lung, breast, colon, and pancreatic cancers. Disappointingly, however, no significant antitumor activity of CI-1040 in these two clinical trials was demonstrated. Insufficient potency and bioavailability may have potentially contributed to the negative results but did not seem to ex-

plain completely the discrepancy in the results on CI-1040 between the preclinical and clinical studies. An interesting recent study demonstrated that MEK inhibitors, including the CI-1040 compound, could preferentially inhibit the growth and proliferation of cell lines or tumor xenografts derived from various human cancers that harbored *BRAF* mutation (175). It was concluded that *BRAF* mutation predicted sensitivity of human cancer cells to MEK inhibitors. This may at least partially explain the failure of CI-1040 to show significant antitumor effects in the two clinical trials because the cancers studied generally infrequently harbor *BRAF* mutation. In fact, disease stabilization with CI-1040 was observed in some patients in the two clinical trials (176, 177), and in one of them (177), a nearly significant association of disease stabilization by CI-1040 with baseline phosphorylation level of ERK in the tumor was observed ( $P < 0.055$ ). This result raises the possibility that a high activity of the MAPK pathway, such as that achieved with *BRAF* mutation, may be a prerequisite for MEK inhibitors to exert therapeutic effects.

This *BRAF* mutation-sensitized effect of CI-1040 in other human cancers was recently reproduced in thyroid cancer cells (178). In this study, it was shown that CI-1040 inhibited the growth and proliferation of thyroid cancer cells harboring mutant *BRAF* but not wild-type *BRAF*. The study also showed that the CI-1040 compound preferentially induced the differentiation of some thyroid cancer cells that harbored *BRAF* mutation. Preferential inhibition of *BRAF* mutation-harboring thyroid cancer cells was in fact also shown with another MEK inhibitor, U0126, in a previous study by Namba *et al.* (40), which was confirmed in a recent study by Henderson *et al.* (179). This drug, however, cannot be developed clinically due to its limited solubility and bioavailability (22, 170). Thyroid cancer cells harboring the *Ras* mutation that was associated with activated MAPK pathway also responded well to the inhibitory effects of CI-1040 (178). This result is consistent with the finding that the *BRAF* inhibitors AAL-881 and LBT-613 could inhibit MAPK pathway signaling, promoted by conditional expression of either *BRAF* mutant or *Ras* mutant, in PCCL3 rat thyroid cells (103). Therefore, in thyroid cancer, MEK inhibitors may be effective in both *BRAF* and *Ras* mutation-harboring cancer cells. In ovary cancer cell lines, it was similarly found that CI-1040 preferentially inhibited the proliferation of cells harboring activating mutant *BRAF* or *Ras* but not wild-type *BRAF* or *Ras* (174). The data are therefore compelling that MEK is a potentially effective therapeutic target in thyroid cancer in which the MAPK pathway is activated by upstream mutations such as *BRAF* and *Ras* mutations. More potent and pharmaceutically superior second-generation MEK inhibitors are currently under development and clinical trial, such as the PD-0325901 compound (22, 25, 167, 168, 170) and the ARRY-142886 (AZD6244) compound (22, 170). The PD-0325901 compound is structurally similar to CI-1040 but has greatly improved potency with an  $IC_{50}$  of only 1 nM against both MEK1 and MEK2 (170). It also has great biopharmaceutical superiority over CI-1040, and preliminary results from early clinical studies on this drug in patients with solid tumors are promising (22, 170). Like CI-1040, PD-0325901 also showed strong *BRAF* mutation preferentiality in its potent inhibition on

cancer cells and xenograft tumors (175). This *BRAF* mutation-selective effect of PD-0325901 was similarly seen in thyroid cancer cells (D. Liu and M. Xing, unpublished data). The ARRY-142886 (AZD6244) compound also displays great potency and showed promising preliminary results in clinical trials on other cancers (22, 170). This MEK inhibitor was shown to selectively inhibit *BRAF* and *Ras* mutation-harboring cancer cells (180). *BRAF* mutation-selective inhibition of thyroid cancer cells and xenograft tumors by this compound was also demonstrated recently (181). In contrast, the MEK inhibitors discussed here uniformly showed no or only a minimal effect on the proliferation of *RET/PTC*-harboring thyroid cancer cells in different studies (40, 178, 179, 181; D. Liu and M. Xing, unpublished data), consistent with their *BRAF* mutation preferentiality over *RET/PTC*. This interestingly echoes the preferential association of *BRAF* mutation with poorer clinicopathological outcomes of PTC discussed in previous sections. These new MEK inhibitors showed excellent patient tolerability and toxicity profiles in the early clinical trials (22, 170), but this needs to be confirmed in more extensive clinical studies. Given the high prevalence of *BRAF* and *Ras* mutations in thyroid cancer, MEK inhibitors hold great promise as novel and potentially effective therapeutic agents for this cancer. It is anticipated that clinical trials on some of these agents in thyroid cancer will occur in the near future, particularly on those that have been documented to be safe in clinical trials on other cancers. Such trials may be reasonably conducted first on progressive PTC and ATC that are positive for *BRAF* mutation and have lost radioiodine avidity.

### C. Restoring the expression of thyroid iodide-metabolizing genes by suppressing MAPK pathway

The recently demonstrated correlation of *BRAF* mutation with the loss of or decreased expression of a number of thyroid iodide-metabolizing genes, including *NIS*, *TSHR*, *TPO*, *Tg*, and *pendrin* genes in PTC strongly suggests that suppression of the *BRAF*/MEK/MAPK signaling may be able to restore expression of these genes and therefore provide a novel therapeutic approach in conjunction with radioiodine therapy. As discussed in previous sections, several recent studies have demonstrated the restorability of these genes, to various extents, in thyroid cancer cells by inhibiting the *BRAF* and MAPK pathway using either *BRAF* siRNA or specific MEK inhibitors (79, 147, 178). The restorability of expression of *NIS* was particularly encouraging because it plays a central role in iodide uptake of thyroid cells. Because loss of radioiodine avidity is a major cause for failure of radioiodine treatment of thyroid cancer and is associated with *BRAF* mutation in PTC (79, 83, 97), therapy targeted at suppression of *BRAF* and MAPK pathway, such as the use of MEK inhibitors, in conjunction with conventional radioiodine ablation therapy may be particularly effective in treating PTC. Because aberrant methylation of some of the thyroid genes is an important mechanism in their silencing in thyroid cancer (116, 117, 147, 150, 151, 182), use of demethylating agents in conjunction with inhibitors of the MAPK pathway might be synergistically effective in restoring expression of thyroid genes, an attractive possibility that is to be tested. T<sub>4</sub>



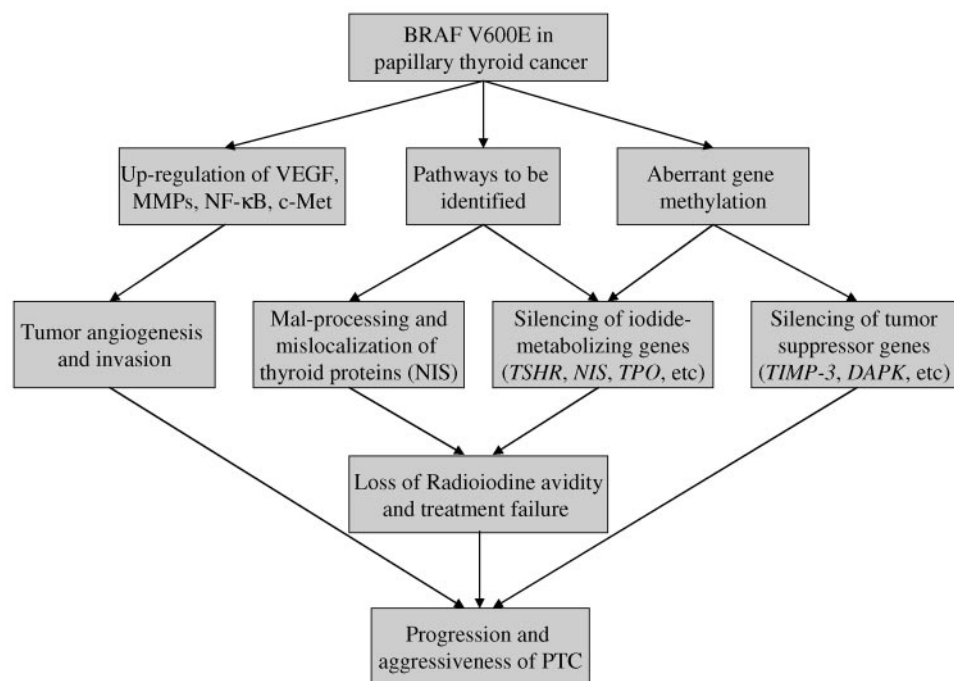

FIG. 4. Summary of the molecular events and pathways involved in *BRAF* mutation-promoted PTC aggressiveness and recurrence. These include overexpression of tumor-promoting molecules such as VEGF, MMPs, NF-κB, and c-Met, silencing of tumor suppressor genes, and silencing and malfunction of thyroid iodide-metabolizing molecules. Aberrant gene methylation plays an important role in some of these molecular events. Additional unidentified molecular events and pathways that are linked to *BRAF* mutation are also expected to exist as indicated. DAPK, Death-associated protein kinase.

withdrawal or the use of recombinant TSH to increase TSH level are routinely used in the radioiodine treatment of thyroid cancer to enhance the uptake of radioiodine and hence the efficacy of treatment. This strategy could be even more effective in enhancing the efficacy of radioiodine treatment if combined with the use of MEK inhibitors to increase the expression of TSHR, which is commonly decreased in thyroid cancer (142–145). It remains to be seen whether such therapeutic strategies directed both at inhibiting cell growth and at the restoration of iodide-metabolizing genes may be of particular benefit in those patients whose thyroid cancers have lost radioiodine avidity and are currently incurable.

#### D. Targeting multiple signaling pathways in aggressive thyroid cancers

ATC and poorly differentiated thyroid cancers are the most aggressive thyroid cancers and account for a major portion of thyroid cancer-associated mortality. Currently, there is virtually no cure for these cancers. In addition to *BRAF* mutation, ATC also frequently harbor one or more genetic alterations in the phosphoinositol-3 kinase (PI3K)/Akt pathway, including *PIK3CA* mutations and amplification, *PTEN* mutations, and *Ras* mutations (183–186; D. Liu and M. Xing, unpublished data). The PI3K/Akt pathway plays an important role in the pathogenesis and progression of human cancers (187, 188). Targeting this pathway is another important strategy in the current development of novel treatments for human cancers, including thyroid cancer. Overlap of *BRAF* mutation with genetic alterations in the PI3K/Akt pathway was common in ATC (183, 184; D. Liu

and M. Xing, unpublished data). Interestingly, the rate of such overlap of *BRAF* mutation with PI3K/Akt pathway-related genetic alterations increased as thyroid tumor progressed from low grade to a more aggressive form (184). Therefore, simultaneous targeting of both the MAPK pathway and PI3K/Akt pathway using specific inhibitors may be a more effective, and perhaps necessary, approach in treating this lethal cancer. Inclusion of the multikinase inhibitor BAY 43-9006 in such a combination therapy would likely enhance the therapeutic efficacy. As discussed in previous sections, *BRAF* mutation is coupled to several other tumor-promoting molecular pathways, including the VEGF, MMP, NF-κB, and c-Met systems. It is likely that the PI3K/Akt pathway is also coupled to multiple signaling pathways that are yet to be identified. It is conceivable that targeting these pathways could also be therapeutically effective for thyroid cancer depending on their dominance level in the pathogenesis of thyroid cancer. As the molecular events and signalings coupled to MAPK and PI3K/Akt pathways become more clearly dissected, an effective combination therapy using combined inhibitors targeting at multiple molecular pathways may become possible for aggressive and lethal thyroid cancers.

## VII. Concluding Remarks

From numerous clinicopathological and molecular studies, it is clear that *BRAF* mutation plays a fundamental role in the pathogenesis of PTC. Recent data support the notion that *BRAF* mutation not only initiates PTC, but also maintains and promotes the progression and aggressiveness of

PTC. Its unique predictive value for aggressive pathological characteristics and for clinical progression and recurrence of PTC may make *BRAF* mutation a useful prognostic marker that can be applied to managing patients with PTC. As illustrated in Fig. 4, several molecular bases of *BRAF* mutation-associated progression and aggressiveness of PTC have been revealed recently, which include down-regulation of major tumor suppressors and important thyroid-specific molecules as well as up-regulation of tumor-promoting molecules and pathways. This prognostic molecular marker may be a useful guide for the management of PTC even before thyroid operation and continue to be so in the posttreatment follow-up of the patient. Although there is not yet an agreement on how *BRAF* mutation as a prognostic marker can be specifically used, it will likely have an impact on the management of PTC patients in the clinic. A prospective multicenter study, involving both endocrinologists and surgeons, would best evaluate the value of this novel molecular marker in the surgical and medical management of PTC patients. The strong therapeutic potential of targeting the MAPK pathway represents another exciting dimension that *BRAF* mutation may add to thyroid cancer medicine. Clinical trials on related novel and promising agents for treating thyroid cancer are being eagerly awaited and may fundamentally affect the current treatment of thyroid cancer. In particular, potent MEK inhibitors may prove to be the first effective therapeutic agents for thyroid cancer. Perhaps the day when an effective treatment for aggressive and lethal thyroid cancer, such as PTC with advanced stages and aggressive ATC that have lost radioiodine avidity, will be available is not too far away.

### Acknowledgments

The author thanks Ms. Kathryn A. Carson for her wonderful help with the statistical aspects of this article and all the collaborators who contributed to the work cited in this article.

Address all correspondence and requests for reprints to: Michael Mingzhao Xing, M.D., Ph.D., Associate Professor of Medicine and Oncology, Division of Endocrinology and Metabolism, Department of Medicine, The Johns Hopkins University School of Medicine, 1830 East Monument Street, Suite 333, Baltimore, Maryland 21287. E-mail: mxing1@jhmi.edu

This work was supported by a National Institutes of Health RO-1 grant (CA113507-01) and an American Cancer Society Research Scholar Grant (RSG-05-199-01-CCE) to the author.

The author has no conflict of interest to disclose.

### References

- Davies L, Welch HG 2006 Increasing incidence of thyroid cancer in the United States, 1973–2002. *JAMA* 295:2164–2167
- Leenhardt L, Grosclaude P, Cherie-Challine L 2004 Increased incidence of thyroid carcinoma in France: a true epidemic or thyroid nodule management effects? Report from the French Thyroid Cancer Committee. *Thyroid* 14:1056–1060
- Mazzaferri EL 2006 An overview of the management of thyroid cancer. In: Mazzaferri EL, Harmer C, Mallick UK, Kendall-Taylor P, eds. *Practical management of thyroid cancer: a multidisciplinary approach*. London: Springer-Verlag; 1–28
- Ries LAG, Melbert D, Krapcho M, Mariotto A, Miller BA, Feuer EJ, Clegg L, Horner MJ, Howlander N, Eisner MP, Reichman M, Edwards BK 2007 SEER Cancer Statistics Review, 1975–2004. Bethesda, MD: National Cancer Institute. [http://seer.cancer.gov/csr/1975\\_2004/](http://seer.cancer.gov/csr/1975_2004/), based on November 2006 SEER data submission, posted to the SEER web site
- Hundahl SA, Fleming ID, Fremgen AM, Menck HR 1998 A National Cancer Data Base report on 53,856 cases of thyroid carcinoma treated in the U.S., 1985–1995 [see comments]. *Cancer* 83:2638–2648
- Mazzaferri EL, Jhiang SM 1994 Long-term impact of initial surgical and medical therapy on papillary and follicular thyroid cancer. *Am J Med* 97:418–428
- Cooper DS, Doherty GM, Haugen BR, Kloos RT, Lee SL, Mandel SJ, Mazzaferri EL, McIver B, Sherman SI, Tuttle RM 2006 Management guidelines for patients with thyroid nodules and differentiated thyroid cancer. *Thyroid* 16:109–142
- Sherman SI, Angelos P, Ball DW, Beenken SW, Byrd D, Clark OH, Daniels GH, Dilawari RA, Ehyia H, Farrar WB, Gagel RF, Kandeel F, Kloos RT, Kopp P, Lamonica DM, Loree TR, Lydiatt WM, McCaffrey J, Olson Jr JA, Ridge JA, Robbins R, Shah JP, Sisson JC, Thompson NW 2005 Thyroid carcinoma. *J Natl Compr Canc Netw* 3:404–457
- DeGroot LJ, Kaplan EL, McCormick M, Straus FH 1990 Natural history, treatment, and course of papillary thyroid carcinoma. *J Clin Endocrinol Metab* 71:414–424
- Mazzaferri EL, Kloos RT 2001 Clinical review 128: current approaches to primary therapy for papillary and follicular thyroid cancer. *J Clin Endocrinol Metab* 86:1447–1463
- Sherman SI, Brierley JD, Sperling M, Ain KB, Bigos ST, Cooper DS, Haugen BR, Ho M, Klein I, Ladenson PW, Robbins J, Ross DS, Specker B, Taylor T, Maxon III HR 1998 Prospective multicenter study of thyroid carcinoma treatment: initial analysis of staging and outcome. National Thyroid Cancer Treatment Cooperative Study Registry Group. *Cancer* 83:1012–1021
- Tanaka K, Sonoo H, Hirano M, Ohkubo S, Nomura T, Ikeda M, Nakajima K, Kurebayashi J 2005 Retrospective analysis of predictive factors for recurrence after curatively resected papillary thyroid carcinoma. *Surg Today* 35:714–719
- Xing M 2005 *BRAF* mutation in thyroid cancer. *Endocr Relat Cancer* 12:245–262
- Chan JK 1990 Papillary carcinoma of thyroid: classical and variants. *Histol Histopathol* 5:241–257
- Lang BH, Lo CY, Chan WF, Lam AK, Wan KY 2006 Classical and follicular variant of papillary thyroid carcinoma: a comparative study on clinicopathologic features and long-term outcome. *World J Surg* 30:752–758
- Keelawat S, Poumsuk U 2006 Association between different variants of papillary thyroid carcinoma and risk-group according to AMES (age, metastasis, extent and size) classification system. *J Med Assoc Thai* 89:484–489
- Michels JJ, Jacques M, Henry-Amar M, Bardet S 2007 Prevalence and prognostic significance of tall cell variant of papillary thyroid carcinoma. *Hum Pathol* 38:212–219
- Mazzaferri EL 2006 Managing small thyroid cancers. *JAMA* 295:2179–2182
- MacCorkle RA, Tan TH 2005 Mitogen-activated protein kinases in cell-cycle control. *Cell Biochem Biophys* 43:451–461
- Robinson MJ, Cobb MH 1997 Mitogen-activated protein kinase pathways. *Curr Opin Cell Biol* 9:180–186
- Torii S, Nakayama K, Yamamoto T, Nishida E 2004 Regulatory mechanisms and function of ERK MAP kinases. *J Biochem (Tokyo)* 136:557–561
- Kohno M, Pouyssegur J 2006 Targeting the ERK signaling pathway in cancer therapy. *Ann Med* 38:200–211
- Mercer KE, Pritchard CA 2003 Raf proteins and cancer: B-Raf is identified as a mutational target. *Biochim Biophys Acta* 1653:25–40
- Rodriguez-Viciana P, Tetsu O, Oda K, Okada J, Rauen K, McCormick F 2005 Cancer targets in the Ras pathway. *Cold Spring Harb Symp Quant Biol* 70:461–467
- Sebolt-Leopold JS, Herrera R 2004 Targeting the mitogen-activated protein kinase cascade to treat cancer. *Nat Rev Cancer* 4:937–947
- Hoshino R, Chatani Y, Yamori T, Tsuruo T, Oka H, Yoshida O, Shimada Y, Ari-i S, Wada H, Fujimoto J, Kohno M 1999 Constitutive activation of the 41-/43-kDa mitogen-activated protein kinase signaling pathway in human tumors. *Oncogene* 18:813–822

27. Ciampi R, Nikiforov YE 2007 RET/PTC rearrangements and *BRAF* mutations in thyroid tumorigenesis. *Endocrinology* 148:936–941
28. Santoro M, Melillo RM, Fusco A 2006 RET/PTC activation in papillary thyroid carcinoma: European Journal of Endocrinology Prize Lecture. *Eur J Endocrinol* 155:645–653
29. Knauf JA, Kuroda H, Basu S, Fagin JA 2003 RET/PTC-induced dedifferentiation of thyroid cells is mediated through Y1062 signaling through SHC-RAS-MAP kinase. *Oncogene* 22:4406–4412
30. Melillo RM, Castellone MD, Guarino V, De Falco V, Cirafici AM, Salvatore G, Caiazza F, Basolo F, Giannini R, Kruhoffer M, Orntoft T, Fusco A, Santoro M 2005 The RET/PTC-RAS-BRAF linear signaling cascade mediates the motile and mitogenic phenotype of thyroid cancer cells. *J Clin Invest* 115:1068–1081
31. Mitsutake N, Miyagishi M, Mitsutake S, Akeno N, Mesa Jr C, Knauf JA, Zhang L, Taira K, Fagin JA 2006 *BRAF* mediates RET/PTC-induced mitogen-activated protein kinase activation in thyroid cells: functional support for requirement of the RET/PTC-RAS-BRAF pathway in papillary thyroid carcinogenesis. *Endocrinology* 147:1014–1019
32. Bos JL 1989 Ras oncogenes in human cancer: a review. *Cancer Res* 49:4682–4689
33. Davies H, Bignell GR, Cox C, Stephens P, Edkins S, Clegg S, Teague J, Woffendin H, Garnett MJ, Bottomley W, Davis N, Dicks E, Ewing R, Floyd Y, Gray K, Hall S, Hawes R, Hughes J, Kosmidou V, Menzies A, Mould C, Parker A, Stevens C, Watt S, Hooper S, Wilson R, Jayatilake H, Gusterson BA, Cooper C, Shipley J, Hargrave D, Pritchard-Jones K, Maitland N, Chenevix-Trench G, Riggins GJ, Bigner DD, Palmieri G, Cossu A, Flanagan A, Nicholson A, Ho JW, Leung SY, Yuen ST, Weber BL, Seigler HF, Darrow TL, Paterson H, Marais R, Marshall CJ, Wooster R, Stratton MR, Futreal PA 2002 Mutations of the *BRAF* gene in human cancer. *Nature* 417:949–954
34. Dhomen N, Marais R 2007 New insight into *BRAF* mutations in cancer. *Curr Opin Genet Dev* 17:31–39
35. Garnett MJ, Marais R 2004 Guilty as charged: B-Raf is a human oncogene. *Cancer Cell* 6:313–319
36. Marais R, Marshall CJ 1996 Control of the ERK MAP kinase cascade by Ras and Raf. In: Parker PJ, Pawson T, eds. *Cell signalling*. Cold Spring Harbor, NY: Cold Spring Harbor Laboratory Press; 101–125
37. Cohen Y, Xing M, Mambo E, Guo Z, Wu G, Trink B, Beller U, Westra WH, Ladenson PW, Sidransky D 2003 *BRAF* mutation in papillary thyroid carcinoma. *J Natl Cancer Inst* 95:625–627
38. Fukushima T, Suzuki S, Mashiko M, Ohtake T, Endo Y, Takebayashi Y, Sekikawa K, Hagiwara K, Takenoshita S 2003 *BRAF* mutations in papillary carcinomas of the thyroid. *Oncogene* 22:6455–6457
39. Kimura ET, Nikiforova MN, Zhu Z, Knauf JA, Nikiforov YE, Fagin JA 2003 High prevalence of *BRAF* mutations in thyroid cancer: genetic evidence for constitutive activation of the RET/PTC-RAS-BRAF signaling pathway in papillary thyroid carcinoma. *Cancer Res* 63:1454–1457
40. Namba H, Nakashima M, Hayashi T, Hayashida N, Maeda S, Rogounovitch TI, Ohtsuru A, Saenko VA, Kanematsu T, Yamashita S 2003 Clinical implication of hot spot *BRAF* mutation, V599E, in papillary thyroid cancers. *J Clin Endocrinol Metab* 88:4393–4397
41. Soares P, Trovisco V, Rocha AS, Lima J, Castro P, Preto A, Maximo V, Botelho T, Seruca R, Sobrinho-Simoes M 2003 *BRAF* mutations and RET/PTC rearrangements are alternative events in the etiopathogenesis of PTC. *Oncogene* 22:4578–4580
42. Xu X, Quiros RM, Gattuso P, Ain KB, Prinz RA 2003 High prevalence of *BRAF* gene mutation in papillary thyroid carcinomas and thyroid tumor cell lines. *Cancer Res* 63:4561–4567
43. Wan PT, Garnett MJ, Roe SM, Lee S, Niculescu-Duvaz D, Good VM, Jones CM, Marshall CJ, Springer CJ, Barford D, Marais R 2004 Mechanism of activation of the RAF-ERK signaling pathway by oncogenic mutations of B-Raf. *Cell* 116:855–867
44. Trovisco V, Vieira de Castro I, Soares P, Maximo V, Silva P, Magalhaes J, Abrosimov A, Guiu XM, Sobrinho-Simoes M 2004 *BRAF* mutations are associated with some histological types of papillary thyroid carcinoma. *J Pathol* 202:247–251
45. Ciampi R, Knauf JA, Kerler R, Gandhi M, Zhu Z, Nikiforova MN, Rabes HM, Fagin JA, Nikiforov YE 2005 Oncogenic AKAP9-BRAF fusion is a novel mechanism of MAPK pathway activation in thyroid cancer. *J Clin Invest* 115:94–101
46. Moretti S, Macchiarulo A, De Falco V, Avenia N, Barbi F, Carta C, Cavaliere A, Melillo RM, Passeri L, Santeusano F, Tartaglia M, Santoro M, Puxeddu E 2006 Biochemical and molecular characterization of the novel *BRAF*(V599Ins) mutation detected in a classic papillary thyroid carcinoma. *Oncogene* 25:4235–4240
47. Hou P, Liu D, Xing M 2007 Functional characterization of the T1799–1801del and A1799–1816ins *BRAF* mutations in papillary thyroid cancer. *Cell Cycle* 6:377–379
48. Oler G, Ebina KN, Michaluart Jr P, Kimura ET, Cerutti J 2005 Investigation of *BRAF* mutation in a series of papillary thyroid carcinoma and matched-lymph node metastasis reveals a new mutation in metastasis. *Clin Endocrinol (Oxf)* 62:509–511
49. Hou P, Xing M 2006 Absence of germline mutations in genes within the MAP kinase pathway in familial non-medullary thyroid cancer. *Cell Cycle* 5:2036–2039
50. Xing M 2005 The T1799A *BRAF* mutation is not a germline mutation in familial nonmedullary thyroid cancer. *Clin Endocrinol (Oxf)* 63:263–266
51. Chiloeches A, Marais R 2006 Is *BRAF* the Achilles' heel of thyroid cancer? *Clin Cancer Res* 12:1661–1664
52. Espinosa AV, Porchia L, Ringel MD 2007 Targeting *BRAF* in thyroid cancer. *Br J Cancer* 96:16–20
53. Groussin L, Fagin JA 2006 Significance of *BRAF* mutations in papillary thyroid carcinoma: prognostic and therapeutic implications. *Nat Clin Pract Endocrinol Metab* 2:180–181
54. Lee JH, Lee ES, Kim YS 2007 Clinicopathologic significance of *BRAF* V600E mutation in papillary carcinomas of the thyroid: a meta-analysis. *Cancer* 110:38–46
55. Trovisco V, Soares P, Sobrinho-Simoes M 2006 B-Raf mutations in the etiopathogenesis, diagnosis, and prognosis of thyroid carcinomas. *Hum Pathol* 37:781–786
56. Wojciechowska K, Lewinski A 2006 *BRAF* mutations in papillary thyroid carcinoma. *Endocr Regul* 40:129–138
57. Xing M 2006 *BRAF* mutation in thyroid carcinogenesis and its clinical implications. *Curr Opin Endocrinol Diabetes* 13:455–459
58. Abrosimov A, Saenko V, Rogounovitch T, Namba H, Lushnikov E, Mitsutake N, Yamashita S 2007 Different structural components of conventional papillary thyroid carcinoma display mostly identical *BRAF* status. *Int J Cancer* 120:196–200
59. Adeniran AJ, Zhu Z, Gandhi M, Steward DL, Fidler JP, Giordano TJ, Biddinger PW, Nikiforov YE 2006 Correlation between genetic alterations and microscopic features, clinical manifestations, and prognostic characteristics of thyroid papillary carcinomas. *Am J Surg Pathol* 30:216–222
60. Durante C, Puxeddu E, Ferretti E, Moris R, Moretti S, Bruno R, Barbi F, Avenia N, Scipioni A, Verrienti A, Tosi E, Cavaliere A, Gulino A, Filetti S, Russo D 2007 *BRAF* mutations in papillary thyroid carcinomas inhibit genes involved in iodine metabolism. *J Clin Endocrinol Metab* 92:2840–2843
61. Frasca F, Nucera C, Belfiore A, Piero G, Attard M, Stella M, Pellegriti G, Giordano C, Trimarchi F, Vigneri R 2006 *BRAF* T1799A mutation in thyroid cancer predicts progressive disease. Program of the 88th Annual Meeting of The Endocrine Society, June 24–27, 2006, Boston, MA (Abstract OR 20-2)
62. Fugazzola L, Mannavola D, Cirello V, Vannucchi G, Muzza M, Vicentini L, Beck-Peccoz P 2004 *BRAF* mutations in an Italian cohort of thyroid cancers. *Clin Endocrinol (Oxf)* 61:239–243
63. Fugazzola L, Puxeddu E, Avenia N, Romei C, Cirello V, Cavaliere A, Faviana P, Mannavola D, Moretti S, Rossi S, Sculli M, Bottici V, Beck-Peccoz P, Pacini F, Pinchera A, Santeusano F, Elisei R 2006 Correlation between B-RafV600E mutation and clinicopathologic parameters in papillary thyroid carcinoma: data from a multicentric Italian study and review of the literature. *Endocr Relat Cancer* 13:455–464
64. Jin L, Sebo TJ, Nakamura N, Qian X, Oliveira A, Majerus JA, Johnson MR, Lloyd RV 2006 *BRAF* mutation analysis in fine needle aspiration (FNA) cytology of the thyroid. *Diagn Mol Pathol* 15:136–143
65. Jo YS, Li S, Song JH, Kwon KH, Lee JC, Rha SY, Lee HJ, Sul JY, Kweon GR, Ro HK, Kim JM, Shong M 2006 Influence of the *BRAF*



- V600E mutation on expression of vascular endothelial growth factor in papillary thyroid cancer. *J Clin Endocrinol Metab* 91:3667–3670
66. Kebebew E, Weng J, Bauer J, Ranvier G, Clark OH, Duh QY, Shihru D, Bastian B, Griffin A 2007 The prevalence and prognostic value of *BRAF* mutation in thyroid cancer. *Ann Surg* 246:466–471
  67. Kim J, Giuliano AE, Turner RR, Gaffney RE, Umetani N, Kitago M, Elashoff D, Hoon DS 2006 Lymphatic mapping establishes the role of *BRAF* gene mutation in papillary thyroid carcinoma. *Ann Surg* 244:799–804
  68. Kim KH, Kang DW, Kim SH, Seong IO, Kang DY 2004 Mutations of the *BRAF* gene in papillary thyroid carcinoma in a Korean population. *Yonsei Med J* 45:818–821
  69. Kim KH, Suh KS, Kang DW, Kang DY 2005 Mutations of the *BRAF* gene in papillary thyroid carcinoma and in Hashimoto's thyroiditis. *Pathol Int* 55:540–545
  70. Kim TY, Kim WB, Song JY, Rhee YS, Gong G, Cho YM, Kim SY, Kim SC, Hong SJ, Shong YK 2005 The *BRAF* mutation is not associated with poor prognostic factors in Korean patients with conventional papillary thyroid microcarcinoma. *Clin Endocrinol (Oxf)* 63:588–593
  71. Kim TY, Kim WB, Rhee YS, Song JY, Kim JM, Gong G, Lee S, Kim SY, Kim SC, Hong SJ, Shong YK 2006 The *BRAF* mutation is useful for prediction of clinical recurrence in low-risk patients with conventional papillary thyroid carcinoma. *Clin Endocrinol (Oxf)* 65:364–368
  72. Lee JH, Lee ES, Kim YS, Won NH, Chae YS 2006 *BRAF* mutation and AKAP9 expression in sporadic papillary thyroid carcinomas. *Pathology* 38:201–204
  73. Liu RT, Chen YJ, Chou FF, Li CL, Wu WL, Tsai PC, Huang CC, Cheng JT 2005 No correlation between *BRAF*V600E mutation and clinicopathological features of papillary thyroid carcinomas in Taiwan. *Clin Endocrinol (Oxf)* 63:461–466
  74. Lupi C, Giannini R, Ugolini C, Proietti A, Berti P, Minuto M, Materazzi G, Elisei R, Santoro M, Miccoli P, Basolo F 2007 Association of *BRAF* V600E mutation with poor clinicopathologic outcomes in 500 consecutive cases of papillary thyroid carcinoma. *J Clin Endocrinol Metab* 92:4085–4090
  75. Mitsiades CS, Negri J, McMullan C, McMillin DW, Sozopoulos E, Fanourakis G, Voutsinas G, Tseloni-Balafouta S, Poulaki V, Batt D, Mitsiades N 2007 Targeting *BRAF*V600E in thyroid carcinoma: therapeutic implications. *Mol Cancer Ther* 6:1070–1078
  76. Nikiforova MN, Kimura ET, Gandhi M, Biddinger PW, Knauf JA, Basolo F, Zhu Z, Giannini R, Salvatore G, Fusco A, Santoro M, Fagin JA, Nikiforov YE 2003 *BRAF* mutations in thyroid tumors are restricted to papillary carcinomas and anaplastic or poorly differentiated carcinomas arising from papillary carcinomas. *J Clin Endocrinol Metab* 88:5399–5404
  77. Park SY, Park YJ, Lee YJ, Lee HS, Choi SH, Choe G, Jang HC, Park SH, Park do J, Cho BY 2006 Analysis of differential *BRAF*(V600E) mutational status in multifocal papillary thyroid carcinoma: evidence of independent clonal origin in distinct tumor foci. *Cancer* 107:1831–1838
  78. Puxeddu E, Moretti S, Elisei R, Romei C, Pascucci R, Martinelli M, Marino C, Avenia N, Rossi ED, Fadda G, Cavaliere A, Ribacchi R, Falorni A, Pontecorvi A, Pacini F, Pinchera A, Santeusanio F 2004 *BRAF*(V599E) mutation is the leading genetic event in adult sporadic papillary thyroid carcinomas. *J Clin Endocrinol Metab* 89:2414–2420
  79. Riesco-Eizaguirre G, Gutierrez-Martinez P, Garcia-Cabezas MA, Nistal M, Santisteban P 2006 The oncogene *BRAF* V600E is associated with a high risk of recurrence and less differentiated papillary thyroid carcinoma due to the impairment of Na<sup>+</sup>/I<sup>-</sup> targeting to the membrane. *Endocr Relat Cancer* 13:257–269
  80. Rodolico V, Cabibi D, Pizzolanti G, Richiusa P, Gebbia N, Martorana A, Russo A, Amato MC, Galluzzo A, Giordano C 2007 *BRAF*(V600E) mutation and p27(kip1) expression in papillary carcinomas of the thyroid  $\leq 1$  cm and their paired lymph node metastases. *Cancer* 110:1218–1226
  81. Sedliarou I, Saenko V, Lantsov D, Rogounovitch T, Namba H, Abrosimov A, Lushnikov E, Kumagai A, Nakashima M, Meirmanov S, Mine M, Hayashi T, Yamashita S 2004 The *BRAF*T1796A transversion is a prevalent mutational event in human thyroid microcarcinoma. *Int J Oncol* 25:1729–1735
  82. Trovisco V, Soares P, Preto A, de Castro IV, Lima J, Castro P, Maximo V, Botelho T, Moreira S, Meireles AM, Magalhaes J, Abrosimov A, Cameselle-Teijeiro J, Sobrinho-Simoes M 2005 Type and prevalence of *BRAF* mutations are closely associated with papillary thyroid carcinoma histotype and patients' age but not with tumour aggressiveness. *Virchows Arch* 446:589–595
  83. Xing M, Westra WH, Tufano RP, Cohen Y, Rosenbaum E, Rhoden KJ, Carson KA, Vasko V, Larin A, Tallini G, Tolaney S, Holt EH, Hui P, Umbricht CB, Basaria S, Ewertz M, Tufaro AP, Califano JA, Ringel MD, Zeiger MA, Sidransky D, Ladenson PW 2005 *BRAF* mutation predicts a poorer clinical prognosis for papillary thyroid cancer. *J Clin Endocrinol Metab* 90:6373–6379
  84. Sapio MR, Posca D, Troncone G, Pettinato G, Palombini L, Rossi G, Fenzi G, Vitale M 2006 Detection of *BRAF* mutation in thyroid papillary carcinomas by mutant allele-specific PCR amplification (MASA). *Eur J Endocrinol* 154:341–348
  85. Powell N, Jeremiah S, Morishita M, Dudley E, Bethel J, Bogdanova T, Tronko M, Thomas G 2005 Frequency of *BRAF* T1796A mutation in papillary thyroid carcinoma relates to age of patient at diagnosis and not to radiation exposure. *J Pathol* 205:558–564
  86. Giannini R, Ugolini C, Lupi C, Proietti A, Elisei R, Salvatore G, Berti P, Materazzi G, Miccoli P, Santoro M, Basolo F 2007 The heterogeneous distribution of *BRAF* mutation supports the independent clonal origin of distinct tumor foci in multifocal papillary thyroid carcinoma. *J Clin Endocrinol Metab* 92:3511–3516
  87. Vasko V, Hu S, Wu G, Xing JC, Larin A, Savchenko V, Trink B, Xing M 2005 High prevalence and possible de novo formation of *BRAF* mutation in metastasized papillary thyroid cancer in lymph nodes. *J Clin Endocrinol Metab* 90:5265–5269
  88. Ivanova R, Soares P, Castro P, Sobrinho-Simoes M 2002 Diffuse (or multinodular) follicular variant of papillary thyroid carcinoma: a clinicopathologic and immunohistochemical analysis of ten cases of an aggressive form of differentiated thyroid carcinoma. *Virchows Arch* 440:418–424
  89. Kakudo K, Tang W, Ito Y, Mori I, Nakamura Y, Miyauchi A 2004 Papillary carcinoma of the thyroid in Japan: subclassification of common type and identification of low risk group. *J Clin Pathol* 57:1041–1046
  90. Frattini M, Ferrario C, Bressan P, Balestra D, De Cecco L, Mondellini P, Bongarzone I, Collini P, Gariboldi M, Pilotti S, Pierotti MA, Greco A 2004 Alternative mutations of *BRAF*, *RET* and *NTRK1* are associated with similar but distinct gene expression patterns in papillary thyroid cancer. *Oncogene* 23:7436–7440
  91. Chung KW, Yang SK, Lee GK, Kim EY, Kwon S, Lee SH, Park do J, Lee HS, Cho BY, Lee ES, Kim SW 2006 Detection of *BRAF*V600E mutation on fine needle aspiration specimens of thyroid nodule refines cyto-pathology diagnosis, especially in *BRAF*V600E mutation-prevalent area. *Clin Endocrinol (Oxf)* 65:660–666
  92. Ghossein RA, Leboeuf R, Patel KN, Rivera M, Katabi N, Carlson DL, Tallini G, Shaha A, Singh B, Tuttle RM 2007 Tall cell variant of papillary thyroid carcinoma without extrathyroid extension: biologic behavior and clinical implications. *Thyroid* 17:655–661
  93. Begum S, Rosenbaum E, Henrique R, Cohen Y, Sidransky D, Westra WH 2004 *BRAF* mutations in anaplastic thyroid carcinoma: implications for tumor origin, diagnosis and treatment. *Mod Pathol* 17:1359–1363
  94. Quiros RM, Ding HG, Gattuso P, Prinz RA, Xu X 2005 Evidence that one subset of anaplastic thyroid carcinomas are derived from papillary carcinomas due to *BRAF* and p53 mutations. *Cancer* 103:2261–2268
  95. Takano T, Ito Y, Hirokawa M, Yoshida H, Miyauchi A 2007 *BRAF* V600E mutation in anaplastic thyroid carcinomas and their accompanying differentiated carcinomas. *Br J Cancer* 96:1549–1553
  96. Ain KB 2000 Management of undifferentiated thyroid cancer. *Baillieres Best Pract Res Clin Endocrinol Metab* 14:615–629
  97. Mian C, Barollo S, Pennelli G, Pavan N, Rugge M, Pelizzo MR, Mazzarotto R, Casara D, Nacamulli D, Mantero F, Opocher G, Busnardo B, Girelli ME, Molecular characteristics in papillary thyroid cancers (PTCs) with no (131)I uptake. *Clin Endocrinol (Oxf)*, in press
  98. Demidchik YE, Demidchik EP, Reiners C, Biko J, Mine M,

- Saenko VA, Yamashita S 2006 Comprehensive clinical assessment of 740 cases of surgically treated thyroid cancer in children of Belarus. *Ann Surg* 243:525–532
99. Jarzab B, Handkiewicz-Junak D, Wloch J 2005 Juvenile differentiated thyroid carcinoma and the role of radioiodine in its treatment: a qualitative review. *Endocr Relat Cancer* 12:773–803
  100. Kumagai A, Namba H, Mitsutake N, Saenko VA, Ohtsuru A, Ito M, Noh JY, Sugino K, Ito K, Yamashita S 2006 Childhood thyroid carcinoma with BRAFT1799A mutation shows unique pathological features of poor differentiation. *Oncol Rep* 16:123–126
  101. Knauf JA, Ma X, Smith EP, Zhang L, Mitsutake N, Liao XH, Refetoff S, Nikiforov YE, Fagin JA 2005 Targeted expression of BRAFV600E in thyroid cells of transgenic mice results in papillary thyroid cancers that undergo dedifferentiation. *Cancer Res* 65:4238–4245
  102. Mesa Jr C, Mirza M, Mitsutake N, Sartor M, Medvedovic M, Tomlinson C, Knauf JA, Weber GF, Fagin JA 2006 Conditional activation of RET/PTC3 and BRAFV600E in thyroid cells is associated with gene expression profiles that predict a preferential role of BRAF in extracellular matrix remodeling. *Cancer Res* 66:6521–6529
  103. Ouyang B, Knauf JA, Smith EP, Zhang L, Ramsey T, Yusuff N, Batt D, Fagin JA 2006 Inhibitors of Raf kinase activity block growth of thyroid cancer cells with RET/PTC or BRAF mutations in vitro and in vivo. *Clin Cancer Res* 12:1785–1793
  104. Salvatore G, Falco V, Salerno P, Nappi T, Pepe S, Troncone G, Carlomagno F, Melillo R, Wilhelm SM, Santora M 2006 BRAF is a therapeutic target in aggressive thyroid carcinoma. *Clin Cancer Res* 12:1623–1629
  105. Liu D, Liu Z, Condouris S, Xing M 2007 BRAF V600E maintains proliferation, transformation, and tumorigenicity of BRAF-mutant papillary thyroid cancer cells. *J Clin Endocrinol Metab* 92:2264–2271
  106. Carta C, Moretti S, Passeri L, Barbi F, Avenia N, Cavaliere A, Monacelli M, Macchiarulo A, Santeusano F, Tartaglia M, Puxeddu E 2006 Genotyping of an Italian papillary thyroid carcinoma cohort revealed high prevalence of BRAF mutations, absence of RAS mutations and allowed the detection of a new mutation of BRAF oncoprotein (BRAF(V599Ins)). *Clin Endocrinol (Oxf)* 64:105–109
  107. Xing M, Cohen Y, Mambo E, Tallini G, Udelsman R, Ladenson PW, Sidransky D 2004 Early occurrence of RASSF1A hypermethylation and its mutual exclusion with BRAF mutation in thyroid tumorigenesis. *Cancer Res* 64:1664–1668
  108. Mitsutake N, Knauf JA, Mitsutake S, Mesa Jr C, Zhang L, Fagin JA 2005 Conditional BRAFV600E expression induces DNA synthesis, apoptosis, dedifferentiation, and chromosomal instability in thyroid PCCL3 cells. *Cancer Res* 65:2465–2473
  109. Wang J, Knauf JA, Basu S, Puxeddu E, Kuroda H, Santoro M, Fusco A, Fagin JA 2003 Conditional expression of RET/PTC induces a weak oncogenic drive in thyroid PCCL3 cells and inhibits thyrotropin action at multiple levels. *Mol Endocrinol* 17:1425–1436
  110. Giordano TJ, Quirk R, Thomas DG, Misk DE, Vinco M, Sanders D, Zhu Z, Ciampi R, Roh M, Shedden K, Gauger P, Doherty G, Thompson NW, Hanash S, Koenig RJ, Nikiforov YE 2005 Molecular classification of papillary thyroid carcinoma: distinct BRAF, RAS, and RET/PTC mutation-specific gene expression profiles discovered by DNA microarray analysis. *Oncogene* 24:6646–6656
  111. Garcia-Rostan G, Zhao H, Camp RL, Pollan M, Herrero A, Pardo J, Wu R, Carcangiu ML, Costa J, Tallini G 2003 ras Mutations are associated with aggressive tumor phenotypes and poor prognosis in thyroid cancer. *J Clin Oncol* 21:3226–3235
  112. Vitagliano D, Portella G, Troncone G, Francione A, Rossi C, Bruno A, Giorgini A, Coluzzi S, Nappi TC, Rothstein JL, Pasquinelli R, Chiappetta G, Terracciano D, Macchia V, Melillo RM, Fusco A, Santoro M 2006 Thyroid targeting of the N-ras(Gln61Lys) oncogene in transgenic mice results in follicular tumors that progress to poorly differentiated carcinomas. *Oncogene* 25:5467–5474
  113. Vasko V, Ferrand M, Di Cristofaro J, Carayon P, Henry JF, de Micco C 2003 Specific pattern of RAS oncogene mutations in follicular thyroid tumors. *J Clin Endocrinol Metab* 88:2745–2752
  114. Di Cristofaro J, Marcy M, Vasko V, Sebag F, Fakhry N, Wynford-Thomas D, De Micco C 2006 Molecular genetic study comparing follicular variant versus classic papillary thyroid carcinomas: association of N-ras mutation in codon 61 with follicular variant. *Hum Pathol* 37:824–830
  115. Zhu Z, Gandhi M, Nikiforova MN, Fischer AH, Nikiforov YE 2003 Molecular profile and clinical-pathologic features of the follicular variant of papillary thyroid carcinoma. An unusually high prevalence of ras mutations. *Am J Clin Pathol* 120:71–77
  116. Hoque MO, Rosenbaum E, Westra WH, Xing M, Ladenson P, Zeiger MA, Sidransky D, Umbrecht CB 2005 Quantitative assessment of promoter methylation profiles in thyroid neoplasms. *J Clin Endocrinol Metab* 90:4011–4018
  117. Hu S, Liu DX, Tufano RP, Carson KA, Rosenbaum E, Cohen Y, Holt EH, Kiseljak-Vassiliades K, Rhoden KJ, Tolaney S, Condouris S, Tallini G, Westra WH, Umbrecht CB, Zeiger MA, Califano J, Vasko V, Xing M 2006 Association of aberrant methylation of tumor suppressor genes with tumor aggressiveness and BRAF mutation in papillary thyroid cancer. *Int J Cancer* 119:2322–2329
  118. Porra V, Ferraro-Peyret C, Durand C, Selmi-Ruby S, Giroud H, Berger-Dutrieux N, Decaussin M, Peix JL, Bournaud C, Orgiazzi J, Borson-Chazot F, Dante R, Rousset B 2005 Silencing of the tumor suppressor gene SLC5A8 is associated with BRAF mutations in classical papillary thyroid carcinomas. *J Clin Endocrinol Metab* 90:3028–3035
  119. Darnton SJ, Hardie LJ, Muc RS, Wild CP, Casson AG 2005 Tissue inhibitor of metalloproteinase-3 (TIMP-3) gene is methylated in the development of esophageal adenocarcinoma: loss of expression correlates with poor prognosis. *Int J Cancer* 115:351–358
  120. Hong C, Maunakea A, Jun P, Bollen AW, Hodgson JG, Goldenberg DD, Weiss WA, Costello JF 2005 Shared epigenetic mechanisms in human and mouse gliomas inactivate expression of the growth suppressor SLC5A8. *Cancer Res* 65:3617–3623
  121. Li H, Myeroff L, Smiraglia D, Romero MF, Pretlow TP, Kasturi L, Lutterbaugh J, Rerko RM, Casey G, Issa JP, Willis J, Willson JK, Plass C, Markowitz SD 2003 SLC5A8, a sodium transporter, is a tumor suppressor gene silenced by methylation in human colon aberrant crypt foci and cancers. *Proc Natl Acad Sci USA* 100:8412–8417
  122. Paroder V, Spencer SR, Paroder M, Arango D, Schwartz Jr S, Mariadason JM, Augenlicht LH, Eskandari S, Carrasco N 2006 Na(+)/monocarboxylate transport (SMCT) protein expression correlates with survival in colon cancer: molecular characterization of SMCT. *Proc Natl Acad Sci USA* 103:7270–7275
  123. Schneider-Stock R, Roessner A, Ullrich O 2005 DAP-kinase—protector or enemy in apoptotic cell death. *Int J Biochem Cell Biol* 37:1763–1767
  124. Youssef EM, Lotan D, Issa JP, Wakasa K, Fan YH, Mao L, Hassan K, Feng L, Lee JJ, Lippman SM, Hong WK, Lotan R 2004 Hypermethylation of the retinoic acid receptor- $\beta$ (2) gene in head and neck carcinogenesis. *Clin Cancer Res* 10:1733–1742
  125. Issa JP 2004 CpG island methylator phenotype in cancer. *Nat Rev Cancer* 4:988–993
  126. Weisenberger DJ, Siegmund KD, Campan M, Young J, Long TI, Faasse MA, Kang GH, Widschwendter M, Weener D, Buchanan D, Koh H, Simms L, Barker M, Leggett B, Levine J, Kim M, French AJ, Thibodeau SN, Jass J, Haile R, Laird PW 2006 CpG island methylator phenotype underlies sporadic microsatellite instability and is tightly associated with BRAF mutation in colorectal cancer. *Nat Genet* 38:787–793
  127. Xing M 2007 Gene methylation in thyroid tumorigenesis. *Endocrinology* 148:948–953
  128. Anand-Apte B, Bao L, Smith R, Iwata K, Olsen BR, Zetter B, Apte SS 1996 A review of tissue inhibitor of metalloproteinases-3 (TIMP-3) and experimental analysis of its effect on primary tumor growth. *Biochem Cell Biol* 74:853–862
  129. Qi JH, Ebrahim Q, Moore N, Murphy G, Claesson-Welsh L, Bond M, Baker A, Anand-Apte B 2003 A novel function for tissue inhibitor of metalloproteinases-3 (TIMP3): inhibition of angiogenesis by blockage of VEGF binding to VEGF receptor-2. *Nat Med* 9:407–415
  130. Neufeld G, Kessler O 2006 Pro-angiogenic cytokines and their role in tumor angiogenesis. *Cancer Metastasis Rev* 25:373–385



131. Cahill S, Smyth P, Denning K, Flavin R, Li J, Potratz A, Guenther SM, Henfrey R, O'Leary JJ, Sheils O 2007 Effect of BRAFV600E mutation on transcription and post-transcriptional regulation in a papillary thyroid carcinoma model. *Mol Cancer* 6:21
132. Yoon H, He H, Nagy R, Davuluri R, Suster S, Schoenberg D, Pellegata N, Chappelle AL 2007 Identification of a novel noncoding RNA gene, NAMA, that is downregulated in papillary thyroid carcinoma with BRAF mutation and associated with growth arrest. *Int J Cancer* 121:767–775
133. Zhang B, Pan X, Cobb GP, Anderson TA 2007 MicroRNAs as oncogenes and tumor suppressors. *Dev Biol* 302:1–12
134. Palona I, Namba H, Mitsutake N, Starenki D, Podtcheko A, Sedliarou I, Ohtsuru A, Saenko V, Nagayama Y, Umezawa K, Yamashita S 2006 BRAFV600E promotes invasiveness of thyroid cancer cells through nuclear factor  $\kappa$ B activation. *Endocrinology* 147:5699–5707
135. Deryugina EI, Quigley JP 2006 Matrix metalloproteinases and tumor metastasis. *Cancer Metastasis Rev* 25:9–34
136. Karin M 2006 Nuclear factor- $\kappa$ B in cancer development and progression. *Nature* 441:431–436
137. Peruzzi B, Bottaro DP 2006 Targeting the c-Met signaling pathway in cancer. *Clin Cancer Res* 12:3657–3660
138. Ruco LP, Stoppacciaro A, Ballarini F, Prat M, Scarpino S 2001 Met protein and hepatocyte growth factor (HGF) in papillary carcinoma of the thyroid: evidence for a pathogenetic role in tumorigenesis. *J Pathol* 194:4–8
139. Nardone HC, Ziober AF, LiVolsi VA, Mandel SJ, Baloch ZW, Weber RS, Mick R, Ziober BL 2003 c-Met expression in tall cell variant papillary carcinoma of the thyroid. *Cancer* 98:1386–1393
140. Nilsson M 2001 Iodide handling by the thyroid epithelial cell. *Exp Clin Endocrinol Diabetes* 109:13–17
141. Yoshida A, Taniguchi S, Hisatome I, Royaux IE, Green ED, Kohn LD, Suzuki K 2002 Pendrin is an iodide-specific apical porter responsible for iodide efflux from thyroid cells. *J Clin Endocrinol Metab* 87:3356–3361
142. Arturi F, Russo D, Bidart JM, Scarpelli D, Schlumberger M, Filetti S 2001 Expression pattern of the pendrin and sodium/iodide symporter genes in human thyroid carcinoma cell lines and human thyroid tumors. *Eur J Endocrinol* 145:129–135
143. Sheils OM, Sweeney EC 1999 TSH receptor status of thyroid neoplasms—TaqMan RT-PCR analysis of archival material. *J Pathol* 188:87–92
144. Venkataraman GM, Yatin M, Marcinek R, Ain KB 1999 Restoration of iodide uptake in dedifferentiated thyroid carcinoma: relationship to human Na<sup>+</sup>/I<sup>−</sup> symporter gene methylation status. *J Clin Endocrinol Metab* 84:2449–2457
145. Ringel MD, Anderson J, Souza SL, Burch HB, Tambascia M, Shriver CD, Tuttle RM 2001 Expression of the sodium iodide symporter and thyroglobulin genes are reduced in papillary thyroid cancer. *Mod Pathol* 14:289–296
146. Di Cristofaro J, Silvy M, Lanteaume A, Marcy M, Carayon P, De Micco C 2006 Expression of tpo mRNA in thyroid tumors: quantitative PCR analysis and correlation with alterations of ret, braf, ras and pax8 genes. *Endocr Relat Cancer* 13:485–495
147. Liu D, Hu S, Hou P, Jiang D, Condouris S, Xing M 2007 Suppression of BRAF/MEK/MAP kinase pathway restores expression of iodide-metabolizing genes in thyroid cells expressing the V600E BRAF mutant. *Clin Cancer Res* 13:1341–1349
148. Ikuyama S, Niller HH, Shimura H, Akamizu T, Kohn LD 1992 Characterization of the 5'-flanking region of the rat thyrotropin receptor gene. *Mol Endocrinol* 6:793–804
149. Yokomori N, Tawata M, Saito T, Shimura H, Onaya T 1998 Regulation of the rat thyrotropin receptor gene by the methylation-sensitive transcription factor GA-binding protein. *Mol Endocrinol* 12:1241–1249
150. Xing M, Usadel H, Cohen Y, Tokumaru Y, Guo Z, Westra WB, Tong BC, Tallini G, Udelsman R, Califano JA, Ladenson PW, Sidransky D 2003 Methylation of the thyroid-stimulating hormone receptor gene in epithelial thyroid tumors: a marker of malignancy and a cause of gene silencing. *Cancer Res* 63:2316–2321
151. Schagdarsurengin U, Gimm O, Dralle H, Hoang-Vu C, Dammann R 2006 CpG island methylation of tumor-related promoters occurs preferentially in undifferentiated carcinoma. *Thyroid* 16:633–642
152. Pizzolanti G, Russo L, Richiusa P, Bronte V, Nuara RB, Rodolico V, Amato MC, Smeraldi L, Sisto PS, Nucera M, Bommarito A, Citarrella R, Coco RL, Cabibi D, Coco AL, Frasca F, Gulotta G, Latteri MA, Modica G, Galluzzo A, Giordano C, Fine-needle aspiration molecular analysis for the diagnosis of papillary thyroid carcinoma through BRAF(V600E) mutation and RET/PTC rearrangement. *Thyroid*, in press
153. Rowe LR, Bentz BG, Bentz JS 2006 Utility of BRAF V600E mutation detection in cytologically indeterminate thyroid nodules. *Cytology* 3:10
154. Kouvaraki MA, Lee JE, Shapiro SE, Sherman SI, Evans DB 2004 Preventable reoperations for persistent and recurrent papillary thyroid carcinoma. *Surgery* 136:1183–1191
155. Sosa JA, Udelsman R 2006 Total thyroidectomy for differentiated thyroid cancer. *J Surg Oncol* 94:701–707
156. Reddy RM, Grigsby PW, Moley JF, Hall BL 2006 Lymph node metastases in differentiated thyroid cancer under 2 cm. *Surgery* 140:1050–1054
157. Biondi B, Filetti S, Schlumberger M 2005 Thyroid-hormone therapy and thyroid cancer: a reassessment. *Nat Clin Pract Endocrinol Metab* 1:32–40
158. Jonklaas J, Sarlis NJ, Litofsky D, Ain KB, Bigos ST, Brierley JD, Cooper DS, Haugen BR, Ladenson PW, Wagner J, Robbins J, Ross DS, Skarulis M, Maxon HR, Sherman SI 2006 Outcomes of patients with differentiated thyroid carcinoma following initial therapy. *Thyroid* 16:1229–1242
159. Ugolini C, Giannini R, Lupi C, Salvatore G, Miccoli P, Proietti A, Elisei R, Santoro M, Basolo F 2007 Presence of BRAF V600E in very early stages of papillary thyroid carcinoma. *Thyroid* 17:381–388
160. Fagin JA 2004 How thyroid tumors start and why it matters: kinase mutants as targets for solid cancer pharmacotherapy. *J Endocrinol* 183:249–256
161. Fagin JA 2005 Genetics of papillary thyroid cancer initiation: implications for therapy. *Trans Am Clin Climatol Assoc* 116:259–269
162. Wilhelm S, Chien DS 2002 BAY 43-9006: preclinical data. *Curr Pharm Des* 8:2255–2257
163. Hahn O, Stadler W 2006 Sorafenib. *Curr Opin Oncol* 18:615–621
164. Eisen T, Ahmad T, Flaherty KT, Gore M, Kaye S, Marais R, Gibbens I, Hackett S, James M, Schuchter LM, Nathanson KL, Xia C, Simantov R, Schwartz B, Poulin-Costello M, O'Dwyer PJ, Ratain MJ 2006 Sorafenib in advanced melanoma: a phase II randomised discontinuation trial analysis. *Br J Cancer* 95:581–586
165. Adnane L, Trail PA, Taylor I, Wilhelm SM 2005 Sorafenib (BAY 43-9006, Nexavar(R)), a dual-action inhibitor that targets RAF/MEK/ERK pathway in tumor cells and tyrosine kinases VEGFR/PDGFR in tumor vasculature. *Methods Enzymol* 407:597–612
166. Carlomagno F, Anaganti S, Guida T, Salvatore G, Troncone G, Wilhelm SM, Santoro M 2006 BAY 43-9006 inhibition of oncogenic RET mutants. *J Natl Cancer Inst* 98:326–334
167. Flaherty KT 2006 Chemotherapy and targeted therapy combinations in advanced melanoma. *Clin Cancer Res* 12:2366s–2370s
168. Thompson N, Lyons J 2005 Recent progress in targeting the Raf/MEK/ERK pathway with inhibitors in cancer drug discovery. *Curr Opin Pharmacol* 5:350–356
169. Wallace EM, Lyssikatos JP, Yeh T, Winkler JD, Koch K 2005 Progress towards therapeutic small molecule MEK inhibitors for use in cancer therapy. *Curr Top Med Chem* 5:215–229
170. Wang D, Boerner SA, Winkler JD, LoRusso PM 2007 Clinical experience of MEK inhibitors in cancer therapy. *Biochim Biophys Acta* 1773:1248–1255
171. Sebolt-Leopold JS, Dudley DT, Herrera R, Van Becelaere K, Wiland A, Gowan RC, Tecle H, Barrett SD, Bridges A, Przybranowski S, Leopold WR, Saltiel AR 1999 Blockade of the MAP kinase pathway suppresses growth of colon tumors in vivo. *Nat Med* 5:810–816
172. Allen LF, Sebolt-Leopold J, Meyer MB 2003 CI-1040 (PD184352), a targeted signal transduction inhibitor of MEK (MAPKK). *Semin Oncol* 30:105–116
173. Collisson EA, De A, Suzuki H, Gambhir SS, Kolodney MS 2003 Treatment of metastatic melanoma with an orally available inhibitor of the Ras-Raf-MAPK cascade. *Cancer Res* 63:5669–5673
174. Pohl G, Ho CL, Kurman RJ, Bristow R, Wang TL, Shih I 2005 Inactivation of the mitogen-activated protein kinase pathway as a



- potential target-based therapy in ovarian serous tumors with KRAS or BRAF mutations. *Cancer Res* 65:1994–2000
175. Solit DB, Garraway LA, Pratilas CA, Sawai A, Getz G, Basso A, Ye Q, Lobo JM, She Y, Osman I, Golub TR, Sebolt-Leopold J, Sellers WR, Rosen N 2006 BRAF mutation predicts sensitivity to MEK inhibition. *Nature* 439:358–362
  176. Lorusso PM, Adjei AA, Varterasian M, Gadgeel S, Reid J, Mitchell DY, Hanson L, DeLuca P, Bruzek L, Piens J, Asbury P, Van Becelaere K, Herrera R, Sebolt-Leopold J, Meyer MB 2005 Phase I and pharmacodynamic study of the oral MEK inhibitor CI-1040 in patients with advanced malignancies. *J Clin Oncol* 23:5281–5293
  177. Rinehart J, Adjei AA, Lorusso PM, Waterhouse D, Hecht JR, Natale RB, Hamid O, Varterasian M, Asbury P, Kaldjian EP, Gulyas S, Mitchell DY, Herrera R, Sebolt-Leopold JS, Meyer MB 2004 Multicenter phase II study of the oral MEK inhibitor, CI-1040, in patients with advanced non-small-cell lung, breast, colon, and pancreatic cancer. *J Clin Oncol* 22:4456–4462
  178. Liu D, Liu, Jiang D, Dackiw AP, Xing M, Inhibitory effects of the MEK inhibitor CI-1040 on the proliferation and tumor growth of thyroid cancer cells with *BRAF* or *RAS* mutations. *J Clin Endocrinol Metab*, in press
  179. Henderson YC, Fredrick MJ, Clayman GL 2007 Differential responses of human papillary thyroid cancer cell lines carrying the RET/PTC1 rearrangement or a BRAF mutation to MEK1/2 inhibitors. *Arch Otolaryngol Head Neck Surg* 133:810–815
  180. Yeh T, Wallace E, Lyssikatos J, Winkler J 2004 ARRY-142886, a potent and selective MEK inhibitor: II) potency against cellular MEK leads to inhibition of cellular proliferation and induction of apoptosis in cell lines with mutant Ras or B-Raf. *Proc Am Assoc Cancer Res* 45:3889 (Abstract)
  181. Ball DW, Jin N, Rosen DM, Dackiw A, Sidransky D, Xing M, Nelkin BD 2007 Selective growth inhibition in BRAF mutant thyroid cancer by the MEK 1/2 inhibitor AZD6244 (ARRY-142886). *J Clin Endocrinol Metab* 92:4712–4718
  182. Xing M, Tokumaru Y, Wu G, Westra WB, Ladenson PW, Sidransky D 2003 Hypermethylation of the Pendred syndrome gene SLC26A4 is an early event in thyroid tumorigenesis. *Cancer Res* 63:2312–2315
  183. Garcia-Rostan G, Costa AM, Pereira-Castro I, Salvatore G, Hernandez R, Hermsem MJ, Herrero A, Fusco A, Cameselle-Teijeiro J, Santoro M 2005 Mutation of the PIK3CA gene in anaplastic thyroid cancer. *Cancer Res* 65:10199–10207
  184. Hou P, Liu D, Shan Y, Hu S, Studeman K, Condouris S, Wang Y, Trink A, El Naggar AK, Tallini G, Vasko V, Xing M 2007 Genetic alterations and their relationship in the phosphatidylinositol 3-kinase/Akt pathway in thyroid cancer. *Clin Cancer Res* 13:1161–1170
  185. Liu D, Mambo E, Ladenson PW, Xing M 2005 Letter re: uncommon mutation but common amplifications of the PIK3CA gene in thyroid tumors. *J Clin Endocrinol Metab* 90:5509
  186. Wu G, Mambo E, Guo Z, Hu S, Huang X, Gollin SM, Trink B, Ladenson PW, Sidransky D, Xing M 2005 Uncommon mutation, but common amplifications, of the PIK3CA gene in thyroid tumors. *J Clin Endocrinol Metab* 90:4688–4693
  187. Fresno Vara JA, Casado E, de Castro J, Cejas P, Belda-Iniesta C, Gonzalez-Baron M 2004 PI3K/Akt signalling pathway and cancer. *Cancer Treat Rev* 30:193–204
  188. Kim D, Cheng GZ, Lindsley CW, Yang H, Cheng JQ 2005 Targeting the phosphatidylinositol-3 kinase/Akt pathway for the treatment of cancer. *Curr Opin Investig Drugs* 6:1250–1258
